# Supplementary material for: Why water makes 2-aminopurine fluorescent?
Source: Royal Society of Chemistry journal article supplement (doi:10.1039/c5cp01151e), 2015-01-01
Supplement: c5cp01151e1.pdf [file c5cp01151e1.pdf]

Supporting Information

**Why Water Makes 2-Aminopurine Fluorescent**

Mario Barbatti and Hans Lischka

**TABLE OF CONTENTS**

|             |                                                   |   |
|-------------|---------------------------------------------------|---|
| SECTION S1. | SINGLET STATES.....                               | 2 |
| SECTION S2. | STATIONARY POINTS AND CONICAL INTERSECTIONS ..... | 4 |
| SECTION S3. | TRIPLET STATES .....                              | 6 |
| SECTION S4. | REACTION PATH TO C6 X.....                        | 7 |
| SECTION S5. | MOLECULAR ORBITALS .....                          | 8 |
| SECTION S6. | ADDITIONAL REFERENCES .....                       | 9 |
| SECTION S7. | CARTESIAN COORDINATES .....                       | 9 |

## SECTION S1. SINGLET STATES

Table S1. Vertical excitation energies ( $\Delta E_v$ ) and oscillator strengths ( $f$ ) at the  $S_0$  minimum for 2AP and 2AP-water clusters computed at ADC(2)/aug-cc-pVDZ. The three main orbital-transition contributions ( $c_i$ ) and their percentages are given as well. Rs and Rp indicate Rydberg orbitals with s or p character.

| 2AP     | $\Delta E_v$ (eV) | $f$   | $c_1$           | %    | $c_2$           | %    | $c_3$           | %    |
|---------|-------------------|-------|-----------------|------|-----------------|------|-----------------|------|
| $S_1$   | 4.32              | 0.155 | $\pi$ - $\pi^*$ | 46.0 | $\pi$ - $\pi^*$ | 29.1 | $\pi$ -Rp       | 4.5  |
| $S_2$   | 4.46              | 0.003 | $n$ - $\pi^*$   | 48.7 | $n$ - $\pi^*$   | 33.1 | $n$ -Rp         | 5.3  |
| $S_3$   | 5.21              | 0.004 | $\pi$ -Rs       | 51.5 | $\pi$ -Rs       | 21.0 | $\pi$ -Rs       | 5.0  |
| $S_4$   | 5.37              | 0.057 | $\pi$ - $\pi^*$ | 21.5 | $\pi$ - $\pi^*$ | 20.9 | $\pi$ - $\pi^*$ | 13.0 |
| 2AP-1W  | $\Delta E_v$ (eV) | $f$   | $c_1$           | %    | $c_2$           | %    | $c_3$           | %    |
| $S_1$   | 4.31              | 0.165 | $\pi$ - $\pi^*$ | 47.5 | $\pi$ -Rp       | 18.7 | $\pi$ -Rp       | 7.2  |
| $S_2$   | 4.53              | 0.002 | $n$ - $\pi^*$   | 50.0 | $n$ -Rp         | 21.0 | $n$ -Rp         | 8.0  |
| $S_3$   | 5.23              | 0.008 | $\pi$ -Rs       | 42.5 | $\pi$ - $\pi^*$ | 6.8  | $\pi$ -Rs       | 5.5  |
| $S_4$   | 5.32              | 0.011 | $\pi$ - $\pi^*$ | 27.8 | $\pi$ -Rs       | 13.1 | $\pi$ -Rp       | 10.8 |
| 2AP-1WT | $\Delta E_v$ (eV) | $f$   | $c_1$           | %    | $c_2$           | %    | $c_3$           | %    |
| $S_1$   | 4.17              | 0.146 | $\pi$ - $\pi^*$ | 48.7 | $\pi$ - $\pi^*$ | 20.4 | $\pi$ -Rp       | 10.9 |
| $S_2$   | 4.57              | 0.002 | $n$ - $\pi^*$   | 52.4 | $n$ - $\pi^*$   | 23.1 | $n$ -Rp         | 12.1 |
| $S_3$   | 5.21              | 0.001 | $\pi$ -Rp       | 62.8 | $\pi$ -Rp       | 10.6 | $\pi$ -Rs       | 5.8  |
| $S_4$   | 5.31              | 0.080 | $\pi$ - $\pi^*$ | 21.7 | $\pi$ -Rp       | 12.1 | $\pi$ -Rp       | 9.5  |
| 2AP-2W  | $\Delta E_v$ (eV) | $f$   | $c_1$           | %    | $c_2$           | %    | $c_3$           | %    |
| $S_1$   | 4.28              | 0.167 | $\pi$ - $\pi^*$ | 49.4 | $\pi$ - $\pi^*$ | 17.7 | $\pi$ - $\pi^*$ | 9.6  |
| $S_2$   | 4.55              | 0.002 | $n$ - $\pi^*$   | 52.5 | $n$ - $\pi^*$   | 19.7 | $n$ - $\pi^*$   | 10.3 |
| $S_3$   | 5.21              | 0.005 | $\pi$ -Rs       | 27.8 | $\pi$ - $\pi^*$ | 18.5 | $\pi$ -Rp       | 6.3  |
| $S_4$   | 5.28              | 0.008 | $\pi$ -Rs       | 29.1 | $\pi$ - $\pi^*$ | 19.4 | $\pi$ - $\pi^*$ | 6.7  |
| 2AP-2WT | $\Delta E_v$ (eV) | $f$   | $c_1$           | %    | $c_2$           | %    | $c_3$           | %    |
| $S_1$   | 4.17              | 0.157 | $\pi$ - $\pi^*$ | 50.3 | $\pi$ -Rp       | 9.5  | $\pi$ -Rp       | 8.9  |
| $S_2$   | 4.66              | 0.002 | $n$ - $\pi^*$   | 53.9 | $n$ -Rp         | 10.6 | $n$ -Rp         | 10.0 |
| $S_3$   | 5.24              | 0.015 | $\pi$ - $\pi^*$ | 31.7 | $\pi$ - $\pi^*$ | 11.8 | $\pi$ - $\pi^*$ | 8.9  |
| $S_4$   | 5.31              | 0.004 | $\pi$ -Rs       | 48.9 | $\pi$ -Rs       | 6.5  | $\pi$ -Rp       | 4.6  |
| 2AP-3W  | $\Delta E_v$ (eV) | $f$   | $c_1$           | %    | $c_2$           | %    | $c_3$           | %    |
| $S_1$   | 4.25              | 0.163 | $\pi$ - $\pi^*$ | 48.6 | $\pi$ -Rp       | 12.1 | $\pi$ -Rp       | 8.2  |
| $S_2$   | 4.54              | 0.003 | $n$ - $\pi^*$   | 51.6 | $n$ -Rp         | 13.4 | $n$ -Rp         | 9.1  |
| $S_3$   | 5.21              | 0.004 | $\pi$ -Rs       | 21.6 | $\pi$ - $\pi^*$ | 17.6 | $\pi$ -Rs       | 7.7  |
| $S_4$   | 5.27              | 0.006 | $\pi$ -Rs       | 21.2 | $\pi$ - $\pi^*$ | 19.2 | $\pi$ -Rs       | 8.4  |
| 2AP-3WT | $\Delta E_v$ (eV) | $f$   | $c_1$           | %    | $c_2$           | %    | $c_3$           | %    |
| $S_1$   | 4.12              | 0.159 | $\pi$ - $\pi^*$ | 52.8 | $\pi$ -Rp       | 11.5 | $\pi$ -Rp       | 6.6  |
| $S_2$   | 4.69              | 0.002 | $n$ - $\pi^*$   | 57.0 | $n$ -Rp         | 12.5 | $n$ -Rp         | 7.2  |
| $S_3$   | 5.20              | 0.006 | $\pi$ - $\pi^*$ | 37.2 | $\pi$ -Rp       | 8.1  | $\pi$ -Rp       | 7.8  |
| $S_4$   | 5.29              | 0.004 | $\pi$ -Rs       | 44.5 | $\pi$ -Rs       | 13.6 | $\pi$ -Rs       | 9.8  |
| 2AP-4WT | $\Delta E_v$ (eV) | $f$   | $c_1$           | %    | $c_2$           | %    | $c_3$           | %    |
| $S_1$   | 4.10              | 0.155 | $\pi$ - $\pi^*$ | 30.7 | $\pi$ -Rp       | 12.8 | $\pi$ - $\pi^*$ | 12.5 |
| $S_2$   | 4.68              | 0.002 | $n$ - $\pi^*$   | 33.1 | $n$ -Rp         | 14.1 | $n$ - $\pi^*$   | 13.7 |
| $S_3$   | 5.19              | 0.005 | $\pi$ - $\pi^*$ | 21.5 | $\pi$ -Rp       | 9.0  | $\pi$ - $\pi^*$ | 8.7  |
| $S_4$   | 5.26              | 0.003 | $\pi$ -Rs       | 37.8 | $\pi$ -Rs       | 13.3 | $\pi$ -Rp       | 13.0 |

Table S2. Vertical emission energies ( $\Delta E_e$ ) and oscillator strengths ( $f$ ) at the  $S_1$  minimum for 2AP and 2AP-W clusters computed at ADC(2)/aug-cc-pVDZ. The three main orbital-transition contributions ( $c_i$ ) and their percentages are given as well. Rs and Rp indicate Rydberg orbitals with s or p character.  $\tau_{\text{rad}}$  is the calculated radiative lifetime (Eq. 1).  $\tau_{\text{es}}$  is the experimental excited-state lifetime after  $0_0^0$  excitation.<sup>1</sup>

|                       | $\Delta E_e$ (eV) | $f$   | $c_1$       | %    | $c_2$       | %    | $c_3$       | %    | $\tau_{\text{rad}}$ (ns) | $\tau_{\text{es}}$ (ns) |
|-----------------------|-------------------|-------|-------------|------|-------------|------|-------------|------|--------------------------|-------------------------|
| 2AP ( $n\pi^*$ )      | 2.99              | 0.006 | $n-\pi^*$   | 53.2 | $n$ -Rp     | 10.1 | $\pi-\pi^*$ | 9.8  | 429                      |                         |
| 2AP ( $\pi\pi^*$ )    | 3.14              | 0.098 | $\pi-\pi^*$ | 31.5 | $\pi$ -Rp   | 23.8 | $\pi$ -Rs   | 6.8  | 24                       | 0.156                   |
| 2AP-1W ( $n\pi^*$ )   | 2.75              | 0.022 | $n-\pi^*$   | 23.2 | $n-\pi^*$   | 17.0 | $\pi-\pi^*$ | 15.5 | 138                      |                         |
| 2AP-1W ( $\pi\pi^*$ ) | 3.37              | 0.135 | $\pi-\pi^*$ | 64.4 | $\pi$ -Rp   | 7.3  | $\pi$ -Rs   | 3.1  | 15                       | 0.584                   |
| 2AP-1W-T              | 3.33              | 0.122 | $\pi-\pi^*$ | 70.1 | $\pi$ -Rp   | 5.5  | $\pi$ -Rp   | 2.7  | 19                       | 14.5                    |
| 2AP-2W ( $n\pi^*$ )   | 2.73              | 0.035 | $n-\pi^*$   | 24.5 | $\pi-\pi^*$ | 19.6 | $\pi-\pi^*$ | 15.6 | 88                       |                         |
| 2AP-2W ( $\pi\pi^*$ ) | 3.49              | 0.148 | $\pi-\pi^*$ | 60.1 | $\pi$ -Rp   | 9.0  | $\pi$ -Rp   | 7.6  | 13                       | 2.46                    |
| 2AP-2W-T              | 3.37              | 0.136 | $\pi-\pi^*$ | 60.6 | $\pi$ -Rp   | 9.1  | $\pi$ -Rp   | 6.2  | 15                       | 15.9                    |
| 2AP-3W                | 3.25              | 0.127 | $\pi-\pi^*$ | 47.7 | $\pi$ -Rp   | 11.6 | $\pi$ -Rp   | 9.0  | 17                       | 7.8                     |
| 2AP-3W-T              | 3.29              | 0.133 | $\pi-\pi^*$ | 48.3 | $\pi$ -Rp   | 26.4 | $\pi$ -Rp   | 3.7  | 16                       | 17.0                    |
| 2AP-4W-T              | 3.23              | 0.126 | $\pi-\pi^*$ | 46.9 | $\pi$ -Rp   | 14.7 | $\pi$ -Rp   | 9.3  | 18                       | -                       |

Table S3. Vertical excitation energies ( $\Delta E_v$ ) and oscillator strengths ( $f$ ) at the  $S_0$  minimum for 2AP and 2AP-water clusters computed with different methods.

| 2AP     | ADC(2) (Present work) |       |             | TD-B3LYP <sup>a</sup> |       | CASPT2 <sup>b</sup> |       | DFT/MRCI <sup>c</sup> |      |
|---------|-----------------------|-------|-------------|-----------------------|-------|---------------------|-------|-----------------------|------|
|         | $\Delta E_v$ (eV)     | $f$   | $c_1$       | $\Delta E_v$ (eV)     | $f$   | $\Delta E_v$ (eV)   | $f$   | $\Delta E_v$ (eV)     | $f$  |
| $S_1$   | 4.32                  | 0.155 | $\pi-\pi^*$ | 4.41                  | 0.130 | 4.33                | 0.070 | 4.31                  | 0.18 |
| $S_2$   | 4.46                  | 0.003 | $n-\pi^*$   | 4.45                  | 0.002 | 4.46                | 0.008 | 4.53                  |      |
| $S_3$   | 5.21                  | 0.004 | $\pi$ -Rs   |                       |       |                     |       | 5.16                  |      |
| $S_4$   | 5.37                  | 0.057 | $\pi-\pi^*$ | 5.46                  | 0.054 | 5.33                | 0.148 | 5.16                  |      |
| 2AP-1W  | $\Delta E_v$ (eV)     | $f$   | $c_1$       | $\Delta E_v$ (eV)     | $f$   |                     |       |                       |      |
| $S_1$   | 4.31                  | 0.165 | $\pi-\pi^*$ | 4.42                  | 0.135 |                     |       |                       |      |
| $S_2$   | 4.53                  | 0.002 | $n-\pi^*$   | 4.52                  | 0.002 |                     |       |                       |      |
| $S_3$   | 5.23                  | 0.008 | $\pi$ -Rs   |                       |       |                     |       |                       |      |
| $S_4$   | 5.32                  | 0.011 | $\pi-\pi^*$ | 5.40                  | 0.010 |                     |       |                       |      |
| 2AP-1WT | $\Delta E_v$ (eV)     | $f$   | $c_1$       | $\Delta E_v$ (eV)     | $f$   |                     |       |                       |      |
| $S_1$   | 4.17                  | 0.146 | $\pi-\pi^*$ | 4.26                  | 0.120 |                     |       |                       |      |
| $S_2$   | 4.57                  | 0.002 | $n-\pi^*$   | 4.56                  | 0.002 |                     |       |                       |      |
| $S_3$   | 5.21                  | 0.001 | $\pi$ -Rp   |                       |       |                     |       |                       |      |
| $S_4$   | 5.31                  | 0.080 | $\pi-\pi^*$ | 5.41                  | 0.06  |                     |       |                       |      |
| 2AP-2W  | $\Delta E_v$ (eV)     | $f$   | $c_1$       | $\Delta E_v$ (eV)     | $f$   |                     |       |                       |      |
| $S_1$   | 4.28                  | 0.167 | $\pi-\pi^*$ | 4.41                  | 0.135 |                     |       |                       |      |
| $S_2$   | 4.55                  | 0.002 | $n-\pi^*$   | 4.53                  | 0.002 |                     |       |                       |      |
| $S_3$   | 5.21                  | 0.005 | $\pi$ -Rs   |                       |       |                     |       |                       |      |
| $S_4$   | 5.28                  | 0.008 | $\pi$ -Rs   |                       |       |                     |       |                       |      |
| 2AP-2WT | $\Delta E_v$ (eV)     | $f$   | $c_1$       | $\Delta E_v$ (eV)     | $f$   |                     |       |                       |      |
| $S_1$   | 4.17                  | 0.157 | $\pi-\pi^*$ | 4.27                  | 0.126 |                     |       |                       |      |
| $S_2$   | 4.66                  | 0.002 | $n-\pi^*$   | 4.66                  | 0.001 |                     |       |                       |      |
| $S_3$   | 5.24                  | 0.015 | $\pi-\pi^*$ | 5.38                  | 0.011 |                     |       |                       |      |
| $S_4$   | 5.31                  | 0.004 | $\pi$ -Rs   |                       |       |                     |       |                       |      |
| 2AP-3W  | $\Delta E_v$ (eV)     | $f$   | $c_1$       | $\Delta E_v$ (eV)     | $f$   |                     |       |                       |      |
| $S_1$   | 4.25                  | 0.163 | $\pi-\pi^*$ | 4.38                  | 0.132 |                     |       |                       |      |
| $S_2$   | 4.54                  | 0.003 | $n-\pi^*$   | 4.54                  | 0.001 |                     |       |                       |      |
| $S_3$   | 5.21                  | 0.004 | $\pi$ -Rs   |                       |       |                     |       |                       |      |
| $S_4$   | 5.27                  | 0.006 | $\pi$ -Rs   |                       |       |                     |       |                       |      |
| 2AP-3WT | $\Delta E_v$ (eV)     | $f$   | $c_1$       | $\Delta E_v$ (eV)     | $f$   |                     |       |                       |      |
| $S_1$   | 4.12                  | 0.159 | $\pi-\pi^*$ | 4.26                  | 0.125 |                     |       |                       |      |
| $S_2$   | 4.69                  | 0.002 | $n-\pi^*$   | 4.67                  | 0.002 |                     |       |                       |      |
| $S_3$   | 5.20                  | 0.006 | $\pi-\pi^*$ | 5.33                  | 0.002 |                     |       |                       |      |
| $S_4$   | 5.29                  | 0.004 | $\pi$ -Rs   |                       |       |                     |       |                       |      |

<sup>a</sup> TDDFT/B3LYP/TZVP.<sup>1</sup>

<sup>b</sup> CASPT2//CASSCF(16,13)/6-31G(d,p).<sup>2</sup>

<sup>c</sup> DFT(BHLYP)/MRCI//B3LYP/TZVP+Ryd.<sup>3</sup>

## SECTION S2. STATIONARY POINTS AND CONICAL INTERSECTIONS

Table S4. Absolute (au) and relative (eV) energies of the ground ( $S_0$ ) and first ( $S_1$ ) excited singlet states. Computed adiabatic energies ( $\Delta E_a$ ). Energy barriers computed between the  $S_1$  transition state and the lowest (9H)  $S_1$  minimum. All data for 2AP and 2AP-W clusters computed at ADC(2)/aug-cc-pVDZ.

| 2AP                  | $S_0$ (au)  | $S_1$ (au)  | $S_0$ (eV) | $S_1$ (eV) | $\Delta E_a$ (eV) | Barrier (eV) |
|----------------------|-------------|-------------|------------|------------|-------------------|--------------|
| $S_0$ Min            | -466.091282 | -465.932551 | 0.00       | 4.32       |                   |              |
| $S_1$ Min $n\pi^*$   | -466.058308 | -465.948396 | 0.90       | 3.89       | 3.89              |              |
| $S_1$ Min $\pi\pi^*$ | -466.062064 | -465.946830 | 0.80       | 3.93       | 3.93              |              |
| C2 $S_1$ TS          | -466.005798 | -465.929397 | 2.33       | 4.41       |                   | 0.52         |
| C2 X                 | -465.946273 | -465.945808 | 3.95       | 3.96       |                   |              |
| C6 $S_1$ TS          | -466.035461 | -465.944321 | 1.52       | 4.00       |                   | 0.11         |
| C6 X                 | -465.944314 | -465.943725 | 4.00       | 4.02       |                   | 0.13         |
| 2AP-1W               | $S_0$ (au)  | $S_1$ (au)  | $S_0$ (eV) | $S_1$ (eV) | $\Delta E_a$ (eV) | Barrier (eV) |
| $S_0$ Min            | -542.370211 | -542.211805 | 0.00       | 4.31       |                   |              |
| $S_1$ Min $n\pi^*$   | -542.326795 | -542.225672 | 1.18       | 3.93       | 3.93              |              |
| $S_1$ Min $\pi\pi^*$ | -542.349603 | -542.225908 | 0.56       | 3.93       | 3.93              |              |
| C2 $S_1$ TS          | -542.285889 | -542.209823 | 2.29       | 4.36       |                   | 0.43         |
| C2 X                 | -542.227163 | -542.226699 | 3.89       | 3.91       |                   |              |
| C6 $S_1$ TS          | -542.315072 | -542.221696 | 1.50       | 4.04       |                   | 0.11         |
| C6 X                 | -542.221801 | -542.221183 | 4.04       | 4.06       |                   | 0.13         |
| 3H $S_1$ TS          | -542.315617 | -542.194702 | 1.49       | 4.78       |                   | 0.84         |
| 3H $S_1$ Min         | -542.316105 | -542.232053 | 1.47       | 3.76       |                   |              |
| 2AP-1WT              | $S_0$ (au)  | $S_1$ (au)  | $S_0$ (eV) | $S_1$ (eV) | $\Delta E_a$ (eV) | Barrier (eV) |
| $S_0$ Min            | -542.367770 | -542.214378 | 0.00       | 4.17       |                   |              |
| $S_1$ Min $\pi\pi^*$ | -542.350517 | -542.228279 | 0.47       | 3.80       | 3.80              |              |
| C2 $S_1$ TS          | -542.282275 | -542.206574 | 2.33       | 4.39       |                   | 0.59         |
| C2 X                 | -542.221456 | -542.220974 | 3.98       | 3.99       |                   |              |
| C6 $S_1$ TS          | -542.308688 | -542.218223 | 1.61       | 4.07       |                   | 0.27         |
| C6 X                 | -542.219015 | -542.218446 | 4.05       | 4.06       |                   |              |
| 1H $S_1$ TS          | -542.315912 | -542.213159 | 1.41       | 4.21       |                   | 0.41         |
| 1H $S_1$ Min         | -542.305746 | -542.250937 | 1.69       | 3.18       |                   |              |
| 2AP-2W               | $S_0$ (au)  | $S_1$ (au)  | $S_0$ (eV) | $S_1$ (eV) | $\Delta E_a$ (eV) | Barrier (eV) |
| $S_0$ Min            | -618.651238 | -618.494077 | 0.00       | 4.28       |                   |              |
| $S_1$ Min $n\pi^*$   | -618.607824 | -618.507355 | 1.18       | 3.92       | 3.92              |              |
| $S_1$ Min $\pi\pi^*$ | -618.635979 | -618.507762 | 0.42       | 3.90       | 3.90              |              |
| C2 $S_1$ TS          | -618.568123 | -618.492757 | 2.26       | 4.31       |                   | 0.41         |
| C2 X                 | -618.510189 | -618.509733 | 3.84       | 3.85       |                   |              |
| C6 $S_1$ TS          | -618.595546 | -618.502249 | 1.52       | 4.05       |                   | 0.15         |
| C6 X                 | -618.501906 | -618.501299 | 4.06       | 4.08       |                   | 0.18         |
| 3H $S_1$ TS          | -618.603478 | -618.482079 | 1.30       | 4.60       |                   | 0.70         |
| 3H $S_1$ Min         | -618.602356 | -618.513638 | 1.33       | 3.74       |                   |              |
| 2AP-2WT              | $S_0$ (au)  | $S_1$ (au)  | $S_0$ (eV) | $S_1$ (eV) | $\Delta E_a$ (eV) | Barrier (eV) |
| $S_0$ Min            | -618.646844 | -618.493763 | 0.00       | 4.17       |                   |              |
| $S_1$ Min $\pi\pi^*$ | -618.631375 | -618.507602 | 0.42       | 3.79       | 3.79              |              |
| C2 $S_1$ TS          | -618.562501 | -618.486844 | 2.30       | 4.35       |                   | 0.56         |
| C2 X                 | -618.500144 | -618.499670 | 3.99       | 4.00       |                   |              |
| C6 $S_1$ TS          | -618.588565 | -618.495824 | 1.59       | 4.11       |                   | 0.32         |
| C6 X                 | -618.497182 | -618.496575 | 4.07       | 4.09       |                   |              |

|                               |                     |                     |                     |                     |                   |              |
|-------------------------------|---------------------|---------------------|---------------------|---------------------|-------------------|--------------|
| 3H S <sub>1</sub> TS          | -618.592050         | -618.475458         | 1.49                | 4.66                |                   | 0.87         |
| 3H S <sub>1</sub> Min         | -618.592094         | -618.511054         | 1.49                | 3.70                |                   |              |
| 1H S <sub>1</sub> TS          | -618.596270         | -618.491916         | 1.38                | 4.22                |                   | 0.43         |
| 1H S <sub>1</sub> Min         | -618.588103         | -618.529322         | 1.60                | 3.20                |                   |              |
| 2AP-3W                        | S <sub>0</sub> (au) | S <sub>1</sub> (au) | S <sub>0</sub> (eV) | S <sub>1</sub> (eV) | $\Delta E_a$ (eV) | Barrier (eV) |
| S <sub>0</sub> Min            | -694.927199         | -694.771158         | 0.00                | 4.25                |                   |              |
| S <sub>1</sub> Min $\pi\pi^*$ | -694.905044         | -694.785711         | 0.60                | 3.85                | 3.85              |              |
| C2 S <sub>1</sub> TS          | -694.845213         | -694.768935         | 2.23                | 4.31                |                   | 0.46         |
| C2 X                          | -694.783738         | -694.783208         | 3.90                | 3.92                |                   |              |
| C6 S <sub>1</sub> TS          | -694.871053         | -694.778327         | 1.53                | 4.05                |                   | 0.20         |
| C6 X                          | -694.777957         | -694.777334         | 4.06                | 4.08                |                   |              |
| 3H S <sub>1</sub> Min         | -694.881350         | -694.789223         | 1.25                | 3.75                |                   |              |
| 2AP-3WT                       | S <sub>0</sub> (au) | S <sub>1</sub> (au) | S <sub>0</sub> (eV) | S <sub>1</sub> (eV) | $\Delta E_a$ (eV) | Barrier (eV) |
| S <sub>0</sub> Min            | -694.928091         | -694.776545         | 0.00                | 4.12                |                   |              |
| S <sub>1</sub> Min $\pi\pi^*$ | -694.910850         | -694.789833         | 0.47                | 3.76                | 3.76              |              |
| C2 S <sub>1</sub> TS          | -694.844384         | -694.769698         | 2.28                | 4.31                |                   | 0.55         |
| C2 X                          | -694.783073         | -694.782607         | 3.95                | 3.96                |                   |              |
| C6 S <sub>1</sub> TS          | -694.869040         | -694.776415         | 1.61                | 4.13                |                   | 0.37         |
| C6 X                          | -694.777248         | -694.776588         | 4.10                | 4.12                |                   |              |
| 3H S <sub>1</sub> TS          | -694.879621         | -694.762637         | 1.32                | 4.50                |                   | 0.74         |
| 3H S <sub>1</sub> Min         | -694.881539         | -694.791865         | 1.27                | 3.71                |                   |              |
| 1H S <sub>1</sub> TS          | -694.876755         | -694.772513         | 1.40                | 4.23                |                   | 0.47         |
| 1H S <sub>1</sub> Min         | -694.870507         | -694.810213         | 1.57                | 3.21                |                   |              |
| 2AP-4WT                       | S <sub>0</sub> (au) | S <sub>1</sub> (au) | S <sub>0</sub> (eV) | S <sub>1</sub> (eV) | $\Delta E_a$ (eV) | Barrier (eV) |
| S <sub>0</sub> Min            | -771.204019         | -771.053304         | 0.00                | 4.10                |                   |              |
| S <sub>1</sub> Min $\pi\pi^*$ | -771.185842         | -771.067063         | 0.49                | 3.73                | 3.73              |              |
| C2 S <sub>1</sub> TS          | -771.121417         | -771.045671         | 2.25                | 4.31                |                   | 0.58         |
| C2 X                          | -771.058595         | -771.058062         | 3.96                | 3.97                |                   |              |
| C6 S <sub>1</sub> TS          | -771.144474         | -771.052284         | 1.62                | 4.13                |                   | 0.40         |
| C6 X                          | -771.053179         | -771.052566         | 4.10                | 4.12                |                   |              |
| 3H S <sub>1</sub> Min         | -771.165434         | -771.068458         | 1.05                | 3.69                |                   |              |
| 1H S <sub>1</sub> TS          | -771.151272         | -771.048990         | 1.44                | 4.22                |                   | 0.49         |
| 1H S <sub>1</sub> Min         | -771.144119         | -771.086036         | 1.63                | 3.21                |                   |              |

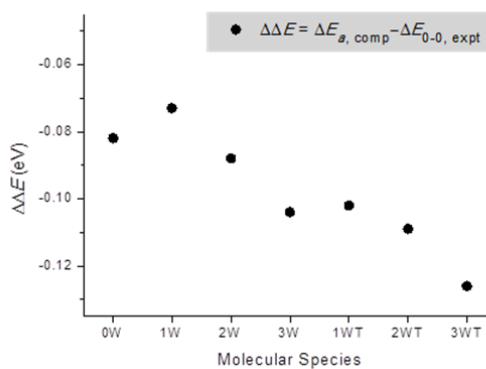

Fig. S1 Energy differences between computed adiabatic excitations into the  $\pi\pi^*$  state and measured<sup>1</sup> band origin.

## SECTION S3. TRIPLET STATES

Table S5. Energy gaps ( $\Delta E$ ) between  $S_0$  and  $T_1$  (ground triplet state) and between  $S_0$  and  $T_2$  (first excited triplet state) at the  $S_1$  minimum for 2AP and 2AP-W clusters computed at ADC(2)/aug-cc-pVDZ. The three main orbital-transition contributions ( $c_i$ ) and their percentages are given as well. Rs and Rp indicate Rydberg orbitals with s or p character.

| 2AP     | $\Delta E$ (eV) | $c_1$           | %    | $c_2$           | %    | $c_3$           | %    |
|---------|-----------------|-----------------|------|-----------------|------|-----------------|------|
| $T_1$   | 2.79            | n- $\pi^*$      | 47.7 | $\pi$ - $\pi^*$ | 10.8 | n-Rp            | 8.9  |
| $T_2$   | 3.10            | $\pi$ - $\pi^*$ | 51.2 | $\pi$ -Rp       | 9.7  | $\pi$ - $\pi^*$ | 8.5  |
| 2AP-1W  | $\Delta E$ (eV) | $c_1$           | %    | $c_2$           | %    | $c_3$           | %    |
| $T_1$   | 2.50            | $\pi$ - $\pi^*$ | 22.6 | $\pi$ -Rp       | 16.9 | n- $\pi^*$      | 15.9 |
| $T_2$   | 2.91            | $\pi$ - $\pi^*$ | 25.7 | $\pi$ -Rp       | 18.5 | $\pi$ - $\pi^*$ | 15.5 |
| 2AP-1WT | $\Delta E$ (eV) | $c_1$           | %    | $c_2$           | %    | $c_3$           | %    |
| $T_1$   | 2.66            | $\pi$ - $\pi^*$ | 75.0 | $\pi$ -Rp       | 5.8  | $\pi$ -Rp       | 2.7  |
| $T_2$   | 4.01            | n- $\pi^*$      | 64.0 | $\pi$ - $\pi^*$ | 6.6  | n-Rp            | 5.2  |
| 2AP-2W  | $\Delta E$ (eV) | $c_1$           | %    | $c_2$           | %    | $c_3$           | %    |
| $T_1$   | 2.43            | $\pi$ - $\pi^*$ | 40.4 | n- $\pi^*$      | 13.1 | $\pi$ -Rp       | 8.0  |
| $T_2$   | 2.92            | $\pi$ - $\pi^*$ | 24.1 | $\pi$ - $\pi^*$ | 19.1 | n- $\pi^*$      | 15.1 |
| 2AP-2WT | $\Delta E$ (eV) | $c_1$           | %    | $c_2$           | %    | $c_3$           | %    |
| $T_1$   | 2.67            | $\pi$ - $\pi^*$ | 64.1 | $\pi$ -Rp       | 9.4  | $\pi$ -Rp       | 7.1  |
| $T_2$   | 4.15            | n- $\pi^*$      | 60.6 | n-Rp            | 8.9  | n-Rp            | 6.8  |
| 2AP-3W  | $\Delta E$ (eV) | $c_1$           | %    | $c_2$           | %    | $c_3$           | %    |
| $T_1$   | 2.59            | $\pi$ - $\pi^*$ | 52.7 | $\pi$ -Rp       | 12.0 | $\pi$ -Rp       | 10.7 |
| $T_2$   | 3.80            | n- $\pi^*$      | 38.1 | $\pi$ - $\pi^*$ | 8.6  | n-Rp            | 8.5  |
| 2AP-3WT | $\Delta E$ (eV) | $c_1$           | %    | $c_2$           | %    | $c_3$           | %    |
| $T_1$   | 2.60            | $\pi$ - $\pi^*$ | 52.6 | $\pi$ -Rp       | 27.1 | $\pi$ -Rp       | 3.9  |
| $T_2$   | 4.10            | n- $\pi^*$      | 43.4 | n-Rp            | 22.5 | $\pi$ - $\pi^*$ | 6.0  |
| 2AP-4WT | $\Delta E$ (eV) | $c_1$           | %    | $c_2$           | %    | $c_3$           | %    |
| $T_1$   | 2.56            | $\pi$ - $\pi^*$ | 50.7 | $\pi$ -Rp       | 14.8 | $\pi$ -Rp       | 9.8  |
| $T_2$   | 4.08            | n- $\pi^*$      | 34.6 | $\pi$ - $\pi^*$ | 11.4 | n-Rp            | 10.1 |

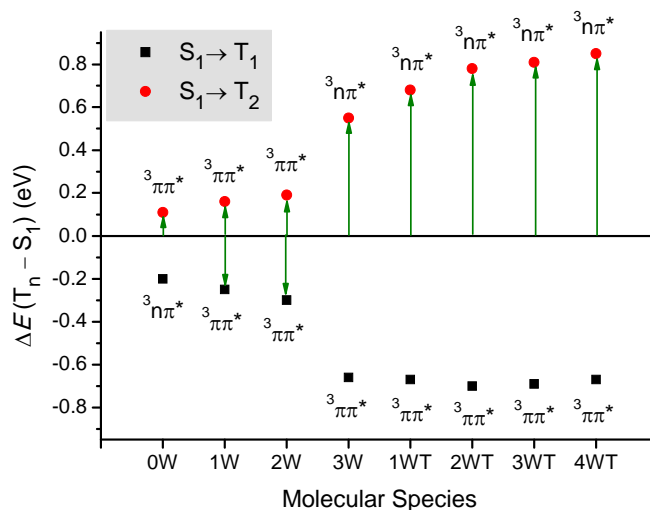

Fig. S2 Energy gaps between  $T_1$  and  $S_1$  and between  $T_2$  and  $S_1$ . The arrows indicate the allowed transitions according to El-Sayed's rule.

## SECTION S4. REACTION PATH TO C6 X

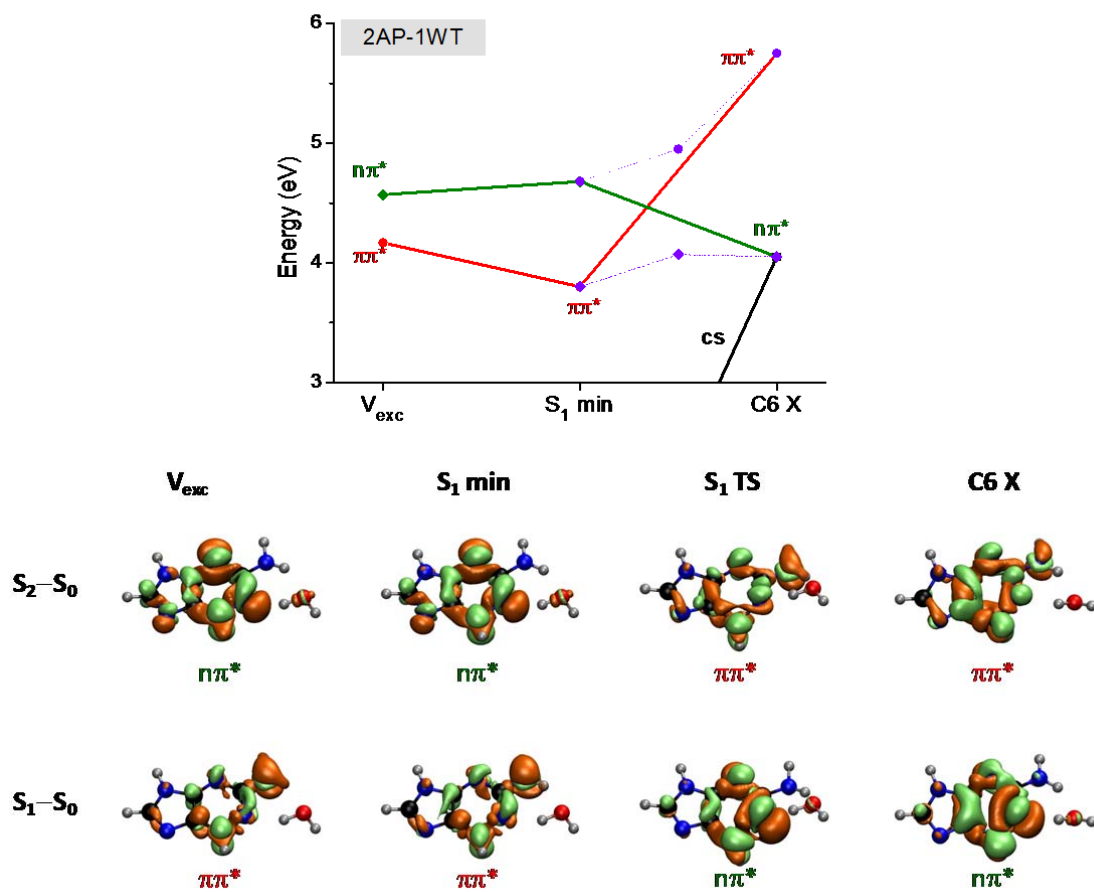

Fig. S3 Diabatic connection of the energies at the  $S_0$  minimum ( $V_{exc}$ ), the  $S_1$  minimum, and C6 X for 2AP-1WT. Dotted lines indicated the adiabatic connections through the  $S_1$  transition state. The  $S_1-S_0$  electron density difference for all structures are shown as well. Orange regions are electron donor and green regions are electron acceptor.

## SECTION S5. MOLECULAR ORBITALS

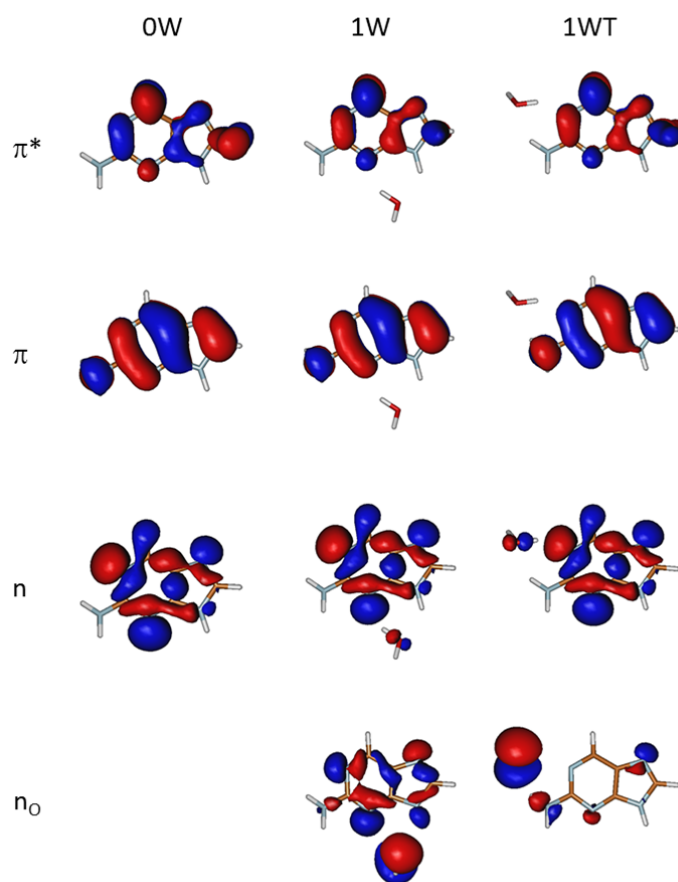

Fig. S4 Canonical Hartree-Fock molecular orbitals for the ground state minimum of 2AP (0W), 2AP-1W, and 2AP-1WT.

—



## SECTION S6. ADDITIONAL REFERENCES

- 1 S. Lobsiger, S. Blaser, R. K. Sinha, H.-M. Frey and S. Leutwyler, *Nat Chem*, 2014, **6**, 989.
- 2 L. Serrano-Andrés, M. Merchán and A. C. Borin, *Proc. Natl. Acad. Sci. USA*, 2006, **103**, 8691.
- 3 K. A. Seefeld, C. Plutzer, D. Lowenich, T. Haber, R. Linder, K. Kleinermanns, J. Tatchen and C. M. Marian, *Phys. Chem. Chem. Phys.*, 2005, **7**, 3021.

## SECTION S7. CARTESIAN COORDINATES

| XYZ format in Angstrom. |           |           |           | H               | -0.978633 | 0.001135  | -0.119552 |
|-------------------------|-----------|-----------|-----------|-----------------|-----------|-----------|-----------|
| 15                      |           |           |           | 15              |           |           |           |
| OW S0                   |           |           |           | OW C2 X         |           |           |           |
| N                       | 0.522144  | 0.110680  | -1.972021 | N               | 0.528812  | -0.190517 | -2.040683 |
| C                       | 1.721424  | 0.024925  | -1.319948 | C               | 1.795530  | -0.028111 | -1.297494 |
| N                       | 1.934536  | -0.088190 | 0.008326  | N               | 1.873413  | -0.718895 | -0.023836 |
| C                       | 0.785453  | -0.085222 | 0.699157  | C               | 0.890403  | -0.202769 | 0.716280  |
| C                       | -0.523219 | 0.012916  | 0.165533  | C               | -0.342959 | 0.267818  | 0.154643  |
| C                       | -0.599467 | 0.104889  | -1.236206 | C               | -0.493989 | 0.128176  | -1.302532 |
| N                       | -1.482679 | -0.014942 | 1.173112  | N               | -1.307794 | 0.395004  | 1.109086  |
| C                       | -0.763022 | -0.127642 | 2.287114  | C               | -0.696346 | 0.033303  | 2.257100  |
| N                       | 0.602826  | -0.177350 | 2.064571  | N               | 0.598895  | -0.364264 | 2.069187  |
| N                       | 2.842620  | 0.117313  | -2.127925 | N               | 2.138815  | 1.354405  | -1.212253 |
| H                       | -1.176299 | -0.178388 | 3.292815  | H               | -1.164346 | 0.058631  | 3.240789  |
| H                       | 1.333955  | -0.254728 | 2.762703  | H               | 1.245905  | -0.685247 | 2.782449  |
| H                       | 3.697108  | -0.245836 | -1.721158 | H               | 3.103413  | 1.464206  | -0.894753 |
| H                       | 2.682047  | -0.110479 | -3.102557 | H               | 2.032269  | 1.797138  | -2.127283 |
| H                       | -1.553450 | 0.170437  | -1.768487 | H               | -1.499378 | 0.138191  | -1.744759 |
| 15                      |           |           |           | 15              |           |           |           |
| OW S1 (np*)             |           |           |           | OW C6 X         |           |           |           |
| N                       | 0.553369  | 0.083090  | -1.856431 | N               | 0.494643  | -0.406339 | -1.825702 |
| C                       | 1.774859  | 0.051856  | -1.357883 | C               | 1.792790  | -0.197900 | -1.288381 |
| N                       | 1.935691  | 0.007159  | -0.001874 | N               | 1.936088  | -0.279721 | 0.006772  |
| C                       | 0.750443  | -0.046361 | 0.698149  | C               | 0.698834  | -0.204938 | 0.697340  |
| C                       | -0.566092 | 0.043810  | 0.186562  | C               | -0.558029 | 0.092413  | 0.184990  |
| C                       | -0.696923 | 0.282732  | -1.238380 | C               | -0.554116 | 0.443890  | -1.261147 |
| N                       | -1.493588 | -0.037452 | 1.195535  | N               | -1.479689 | 0.270316  | 1.192836  |
| C                       | -0.768299 | -0.158901 | 2.315478  | C               | -0.782436 | 0.038188  | 2.318092  |
| N                       | 0.595349  | -0.160302 | 2.054097  | N               | 0.543185  | -0.245281 | 2.060110  |
| N                       | 2.893175  | 0.109615  | -2.164437 | N               | 2.837188  | -0.128221 | -2.169340 |
| H                       | -1.164030 | -0.252678 | 3.323745  | H               | -1.195291 | 0.014707  | 3.322412  |
| H                       | 1.345760  | -0.249934 | 2.730382  | H               | 1.270601  | -0.432331 | 2.743062  |
| H                       | 3.714401  | -0.299496 | -1.726524 | H               | 3.744871  | -0.375347 | -1.785493 |
| H                       | 2.740337  | -0.189442 | -3.122708 | H               | 2.646314  | -0.482285 | -3.100909 |
| H                       | -1.590478 | 0.074687  | -1.830684 | H               | -0.534854 | 1.514009  | -1.538553 |
| 15                      |           |           |           | 15              |           |           |           |
| OW S1 (pp*)             |           |           |           | OW TS S1 - C2 X |           |           |           |
| N                       | 0.251961  | 0.073081  | 1.623608  | N               | 0.447442  | -0.054648 | -2.158660 |
| C                       | 1.502012  | -0.092459 | 2.133631  | C               | 1.619912  | -0.158946 | -1.425109 |
| N                       | 2.707675  | -0.248357 | 1.494151  | N               | 1.777669  | -0.942327 | -0.206008 |
| C                       | 2.481051  | -0.080088 | 0.156073  | C               | 0.832828  | -0.321867 | 0.577224  |
| C                       | 1.231125  | -0.061350 | -0.523127 | C               | -0.441334 | 0.029004  | 0.080179  |
| C                       | 0.012394  | -0.240895 | 0.276025  | C               | -0.642099 | -0.071973 | -1.402112 |
| N                       | 1.407590  | 0.079255  | -1.874665 | N               | -1.303966 | 0.357187  | 1.077471  |
| C                       | 2.744256  | 0.099440  | -2.040489 | C               | -0.568385 | 0.226557  | 2.211315  |
| N                       | 3.425056  | -0.023496 | -0.850444 | N               | 0.708542  | -0.196436 | 1.956407  |
| N                       | 1.572794  | -0.077452 | 3.490063  | N               | 2.604824  | 0.747701  | -1.662525 |
| H                       | 3.254800  | 0.182861  | -2.997633 | H               | -0.931503 | 0.433965  | 3.215336  |
| H                       | 4.430535  | -0.004385 | -0.719109 | H               | 1.435512  | -0.379383 | 2.641219  |
| H                       | 2.463741  | -0.267617 | 3.935403  | H               | 3.545209  | 0.539515  | -1.350303 |
| H                       | 0.723627  | 0.044520  | 4.030684  | H               | 2.460441  | 1.489829  | -2.339149 |
|                         |           |           |           | H               | -1.631693 | -0.053052 | -1.866910 |
|                         |           |           |           | 15              |           |           |           |

|                 |           |           |           |                 |           |           |           |
|-----------------|-----------|-----------|-----------|-----------------|-----------|-----------|-----------|
| OW TS S1 - C6 X |           |           |           |                 |           |           |           |
| N               | 0.539880  | -0.106735 | -1.875794 | N               | 0.709815  | -0.375820 | -1.895773 |
| C               | 1.786998  | 0.062673  | -1.334574 | C               | 1.878938  | -0.028407 | -1.078731 |
| N               | 1.940296  | 0.008289  | -0.008580 | N               | 1.914995  | -0.610107 | 0.259924  |
| C               | 0.732886  | -0.076564 | 0.691438  | C               | 0.822177  | -0.134881 | 0.854204  |
| C               | -0.571987 | 0.015724  | 0.185977  | C               | -0.388126 | 0.214212  | 0.152653  |
| C               | -0.683882 | 0.309001  | -1.249599 | C               | -0.402378 | -0.076468 | -1.287735 |
| N               | -1.500339 | -0.009403 | 1.200075  | N               | -1.416764 | 0.415783  | 1.018905  |
| C               | -0.769176 | -0.128802 | 2.318911  | C               | -0.865739 | 0.212055  | 2.241018  |
| N               | 0.588531  | -0.164876 | 2.051832  | N               | 0.446550  | -0.151702 | 2.192235  |
| N               | 2.868846  | 0.206355  | -2.169455 | N               | 2.093292  | 1.383898  | -1.066357 |
| H               | -1.163569 | -0.219320 | 3.327419  | H               | -1.405406 | 0.318316  | 3.178972  |
| H               | 1.341022  | -0.244158 | 2.727850  | H               | 1.094312  | -0.393324 | 2.949380  |
| H               | 3.754411  | -0.060573 | -1.748207 | H               | 2.978026  | 1.601319  | -0.603913 |
| H               | 2.728787  | -0.129435 | -3.117070 | H               | 2.100235  | 1.755984  | -2.018497 |
| H               | -1.463465 | 0.888284  | -1.763552 | H               | -1.356940 | -0.209016 | -1.812532 |
| 18              |           |           |           | O               | 3.004740  | -0.992940 | 2.854077  |
| 1W S0           |           |           |           | H               | 3.398297  | -1.832878 | 3.121860  |
| N               | 0.629984  | 0.140922  | -1.845479 | H               | 2.970026  | -1.028614 | 1.872749  |
| C               | 1.759754  | -0.015291 | -1.094453 | 18              |           |           |           |
| N               | 1.842563  | -0.159712 | 0.245032  | 1W C6 X         |           |           |           |
| C               | 0.634283  | -0.121018 | 0.837756  | N               | 0.514383  | -0.464116 | -1.766279 |
| C               | -0.612729 | 0.042636  | 0.185488  | C               | 1.781315  | -0.210486 | -1.168901 |
| C               | -0.554150 | 0.170532  | -1.213914 | N               | 1.862122  | -0.245461 | 0.131241  |
| N               | -1.657535 | 0.036597  | 1.101733  | C               | 0.578979  | -0.174442 | 0.750436  |
| C               | -1.041523 | -0.124794 | 2.273810  | C               | -0.643179 | 0.110322  | 0.153735  |
| N               | 0.332671  | -0.227039 | 2.176242  | C               | -0.574048 | 0.404359  | -1.300237 |
| N               | 2.952116  | 0.034311  | -1.799633 | N               | -1.616979 | 0.322806  | 1.104364  |
| H               | -1.548571 | -0.173381 | 3.235620  | C               | -0.977833 | 0.130391  | 2.273120  |
| H               | 1.031384  | -0.349867 | 2.911467  | N               | 0.353322  | -0.164121 | 2.102093  |
| H               | 3.745449  | -0.402060 | -1.344014 | N               | 2.847644  | -0.114322 | -2.015944 |
| H               | 2.856612  | -0.158851 | -2.790491 | H               | -1.442918 | 0.150171  | 3.254500  |
| H               | -1.450121 | 0.294249  | -1.829859 | H               | 1.078355  | -0.329972 | 2.802614  |
| O               | 3.049338  | -0.355976 | 2.817961  | H               | 3.765328  | -0.250690 | -1.603218 |
| H               | 3.012783  | -0.326756 | 1.838979  | H               | 2.718678  | -0.492552 | -2.948936 |
| H               | 3.817045  | -0.899348 | 3.033776  | H               | -0.553634 | 1.456671  | -1.636972 |
| 18              |           |           |           | O               | 3.054937  | -0.629235 | 2.778041  |
| 1W S1 (np*)     |           |           |           | H               | 3.359468  | -1.536786 | 2.909213  |
| N               | 0.585370  | -0.028854 | -1.757469 | H               | 3.009481  | -0.524006 | 1.806590  |
| C               | 1.789184  | -0.044879 | -1.174144 | 18              |           |           |           |
| N               | 1.911720  | -0.095931 | 0.178965  | 1W S1 3H        |           |           |           |
| C               | 0.668250  | -0.112675 | 0.789860  | N               | 0.679669  | 0.195524  | -1.807454 |
| C               | -0.606590 | 0.079716  | 0.198222  | C               | 1.749103  | -0.047853 | -1.078525 |
| C               | -0.645730 | 0.433886  | -1.208311 | N               | 1.744852  | -0.303437 | 0.303140  |
| N               | -1.604912 | 0.000371  | 1.145445  | C               | 0.516996  | -0.144896 | 0.911671  |
| C               | -0.950002 | -0.196454 | 2.296476  | C               | -0.633839 | 0.081578  | 0.199961  |
| N               | 0.423217  | -0.262484 | 2.126659  | C               | -0.573958 | 0.264554  | -1.236671 |
| N               | 2.920249  | -0.018770 | -1.950354 | N               | -1.669935 | -0.103582 | 1.129898  |
| H               | -1.414795 | -0.299388 | 3.274315  | C               | -1.064765 | -0.169232 | 2.398980  |
| H               | 1.158498  | -0.408683 | 2.821497  | N               | 0.237941  | -0.366790 | 2.298532  |
| H               | 3.759395  | -0.361947 | -1.493745 | N               | 3.025123  | -0.031824 | -1.650448 |
| H               | 2.806621  | -0.274360 | -2.924542 | H               | -1.646365 | -0.238279 | 3.315109  |
| H               | -1.533314 | 0.335401  | -1.839081 | H               | 2.117678  | -0.567238 | 3.074631  |
| O               | 3.188851  | -0.391264 | 2.713872  | H               | 3.617949  | -0.805902 | -1.353210 |
| H               | 3.826258  | -1.105816 | 2.837863  | H               | 2.956049  | 0.013324  | -2.664955 |
| H               | 3.103709  | -0.292338 | 1.742457  | H               | -1.430598 | 0.489140  | -1.872849 |
| 18              |           |           |           | O               | 3.048893  | -0.417639 | 2.822347  |
| 1W S1 (pp*)     |           |           |           | H               | 3.573697  | -0.935168 | 3.445385  |
| N               | 0.617187  | 0.010007  | -1.921379 | H               | 2.595397  | -0.297030 | 0.873774  |
| C               | 1.739933  | -0.013658 | -1.154429 | 18              |           |           |           |
| N               | 1.925941  | -0.019411 | 0.216041  | 1W TS S1 - C2 X |           |           |           |
| C               | 0.684818  | -0.106603 | 0.792023  | N               | 0.447442  | -0.054648 | -2.158660 |
| C               | -0.580817 | 0.013896  | 0.155273  | C               | 1.619913  | -0.158946 | -1.425109 |
| C               | -0.608549 | 0.234498  | -1.300811 | N               | 1.777669  | -0.942327 | -0.206008 |
| N               | -1.588472 | -0.075608 | 1.065961  | C               | 0.832828  | -0.321867 | 0.577224  |
| C               | -0.955585 | -0.223373 | 2.262342  | C               | -0.441334 | 0.029004  | 0.080179  |
| N               | 0.401605  | -0.223178 | 2.142958  | C               | -0.642099 | -0.071973 | -1.402112 |
| N               | 2.897575  | -0.044825 | -1.864362 | N               | -1.303966 | 0.357187  | 1.077472  |
| H               | -1.462051 | -0.317706 | 3.220477  | C               | -0.568385 | 0.226557  | 2.211315  |
| H               | 1.122399  | -0.321790 | 2.862219  | N               | 0.708542  | -0.196436 | 1.956407  |
| H               | 3.785490  | -0.008991 | -1.375520 | N               | 2.604824  | 0.747701  | -1.662525 |
| H               | 2.847320  | -0.050096 | -2.878168 | H               | -0.931503 | 0.433965  | 3.215337  |
| H               | -1.514761 | 0.127796  | -1.902005 | H               | 1.435512  | -0.379383 | 2.641219  |
| O               | 3.141269  | -0.253578 | 2.772725  | H               | 3.545209  | 0.539515  | -1.350303 |
| H               | 3.779709  | -0.962492 | 2.920098  | H               | 2.460441  | 1.489829  | -2.339150 |
| H               | 3.066016  | -0.176298 | 1.797099  | H               | -1.631693 | -0.053052 | -1.866910 |
| 18              |           |           |           | O               | 3.344202  | -1.217973 | 2.136976  |
| 1W C2 X         |           |           |           | H               | 3.802215  | -2.041236 | 2.348070  |
|                 |           |           |           | H               | 3.057694  | -1.318600 | 1.202683  |

|                  |           |           |           |                  |           |           |           |
|------------------|-----------|-----------|-----------|------------------|-----------|-----------|-----------|
| 18               |           |           |           | H                | 1.120904  | -0.278929 | -3.661412 |
| 1W TS S1 - C6    |           |           |           | H                | 1.634779  | 0.231440  | -5.036595 |
| N                | 0.539880  | -0.106735 | -1.875795 | 18               |           |           |           |
| C                | 1.786998  | 0.062673  | -1.334575 | 1WT C2 X         |           |           |           |
| N                | 1.940297  | 0.008289  | -0.008580 | N                | 0.682240  | -0.652332 | -1.761978 |
| C                | 0.732887  | -0.076564 | 0.691438  | C                | 1.886493  | -0.248148 | -0.989681 |
| C                | -0.571987 | 0.015724  | 0.185977  | N                | 1.889559  | -0.671680 | 0.399333  |
| C                | -0.683882 | 0.309001  | -1.249599 | C                | 0.827224  | -0.083034 | 0.951532  |
| N                | -1.500340 | -0.009403 | 1.200075  | C                | -0.388352 | 0.163170  | 0.228415  |
| C                | -0.769176 | -0.128802 | 2.318912  | C                | -0.414807 | -0.278751 | -1.173055 |
| N                | 0.588531  | -0.164876 | 2.051833  | N                | -1.432863 | 0.398984  | 1.070714  |
| N                | 2.868847  | 0.206355  | -2.169456 | C                | -0.889699 | 0.326298  | 2.304088  |
| H                | -1.163569 | -0.219320 | 3.327421  | N                | 0.438751  | 0.003140  | 2.286204  |
| H                | 1.341022  | -0.244158 | 2.727851  | N                | 2.127773  | 1.142794  | -1.164982 |
| H                | 3.754412  | -0.060572 | -1.748208 | H                | -1.431423 | 0.509734  | 3.229708  |
| H                | 2.728788  | -0.129435 | -3.117071 | H                | 1.043298  | -0.124791 | 3.093147  |
| H                | -1.463465 | 0.888284  | -1.763553 | H                | 3.010675  | 1.400583  | -0.720799 |
| O                | 3.412673  | -0.306456 | 2.439899  | H                | 2.156433  | 1.366877  | -2.166219 |
| H                | 3.999380  | -1.068617 | 2.526172  | H                | -1.378123 | -0.426400 | -1.678153 |
| H                | 3.238725  | -0.230318 | 1.479314  | O                | 1.605677  | 0.458562  | -4.246284 |
| 18               |           |           |           | H                | 1.247136  | -0.218299 | -3.640367 |
| 1W TS S1 - S1 3H |           |           |           | H                | 2.176958  | -0.028566 | -4.854041 |
| N                | 0.635175  | 0.044663  | -1.818664 | 18               |           |           |           |
| C                | 1.748680  | -0.086847 | -1.069417 | 1WT C6 X         |           |           |           |
| N                | 1.880321  | -0.184900 | 0.317395  | N                | 0.599678  | -0.346399 | -1.695007 |
| C                | 0.636401  | -0.082016 | 0.893851  | C                | 1.860962  | -0.223390 | -1.041841 |
| C                | -0.602426 | 0.021169  | 0.254021  | N                | 1.867183  | -0.380414 | 0.258293  |
| C                | -0.605524 | 0.070518  | -1.222291 | C                | 0.576329  | -0.244917 | 0.822126  |
| N                | -1.583609 | -0.007871 | 1.191015  | C                | -0.600044 | 0.188891  | 0.213284  |
| C                | -0.886033 | -0.107672 | 2.415614  | C                | -0.448736 | 0.552546  | -1.213423 |
| N                | 0.438039  | -0.172844 | 2.282459  | N                | -1.571780 | 0.469688  | 1.152192  |
| N                | 2.926906  | -0.147852 | -1.745664 | C                | -0.995074 | 0.167588  | 2.324385  |
| H                | -1.405253 | -0.132220 | 3.371772  | N                | 0.307581  | -0.264018 | 2.166431  |
| H                | 1.686427  | -0.351789 | 2.751435  | N                | 2.965599  | -0.143922 | -1.809974 |
| H                | 3.804980  | -0.161773 | -1.242455 | H                | -1.481431 | 0.207218  | 3.296995  |
| H                | 2.906649  | -0.041639 | -2.753276 | H                | 0.957243  | -0.530514 | 2.897125  |
| H                | -1.483469 | 0.267753  | -1.839353 | H                | 3.867620  | -0.241098 | -1.360437 |
| O                | 2.840945  | -0.444863 | 2.545803  | H                | 2.868198  | -0.158585 | -2.822962 |
| H                | 3.131556  | -1.341267 | 2.775932  | H                | -0.354706 | 1.618606  | -1.485795 |
| H                | 2.691037  | -0.378346 | 1.391045  | O                | 1.639871  | -0.196387 | -4.344385 |
| 18               |           |           |           | H                | 0.954258  | -0.719011 | -3.896034 |
| 1WT S0           |           |           |           | H                | 1.640740  | -0.497632 | -5.263093 |
| N                | 0.683834  | -0.026693 | -1.781573 | 18               |           |           |           |
| C                | 1.824848  | -0.060493 | -1.016845 | 1WT S1 imino     |           |           |           |
| N                | 1.894435  | -0.089070 | 0.332735  | N                | 0.801542  | -0.107201 | -1.719637 |
| C                | 0.682864  | -0.064491 | 0.902581  | C                | 1.933030  | -0.178368 | -0.953220 |
| C                | -0.569044 | -0.020911 | 0.239317  | N                | 2.006942  | -0.180224 | 0.358361  |
| C                | -0.507332 | -0.009141 | -1.163583 | C                | 0.711179  | -0.108724 | 0.921129  |
| N                | -1.623530 | -0.011568 | 1.147095  | C                | -0.505568 | -0.012273 | 0.255981  |
| C                | -1.016034 | -0.048432 | 2.330335  | C                | -0.500202 | 0.044416  | -1.191489 |
| N                | 0.366536  | -0.082470 | 2.245927  | N                | -1.553856 | 0.036852  | 1.147079  |
| N                | 3.011121  | -0.019885 | -1.708558 | C                | -0.963337 | -0.028725 | 2.357164  |
| H                | -1.527837 | -0.052515 | 3.290999  | N                | 0.402010  | -0.113820 | 2.265726  |
| H                | 1.026937  | -0.110435 | 3.015016  | N                | 3.104963  | -0.263099 | -1.730992 |
| H                | 3.836152  | -0.285217 | -1.186075 | H                | -1.486782 | -0.016836 | 3.310245  |
| H                | 2.975477  | -0.242154 | -2.701986 | H                | 1.065642  | -0.174412 | 3.030333  |
| H                | -1.402789 | 0.010026  | -1.792169 | H                | 3.880737  | -0.319888 | -1.050586 |
| O                | 1.747526  | -0.498008 | -4.372899 | H                | 2.691636  | -0.268157 | -3.713323 |
| H                | 1.140915  | -0.272791 | -3.633641 | H                | -1.348072 | -0.113637 | -1.857949 |
| H                | 1.597736  | 0.189118  | -5.034421 | O                | 1.938567  | -0.311815 | -4.337241 |
| 18               |           |           |           | H                | 0.953153  | -0.123123 | -2.738527 |
| 1WT S1           |           |           |           | H                | 2.102382  | 0.382564  | -4.988489 |
| N                | 0.636615  | -0.080973 | -1.850885 | 18               |           |           |           |
| C                | 1.766578  | -0.132358 | -1.086314 | 1WT TS S1 - C2 X |           |           |           |
| N                | 1.964522  | -0.111081 | 0.276299  | N                | 0.447442  | -0.054648 | -2.158660 |
| C                | 0.731918  | -0.112419 | 0.873984  | C                | 1.619913  | -0.158946 | -1.425109 |
| C                | -0.536118 | 0.011714  | 0.254469  | N                | 1.777669  | -0.942327 | -0.206008 |
| C                | -0.583117 | 0.135138  | -1.207010 | C                | 0.832828  | -0.321867 | 0.577224  |
| N                | -1.534673 | 0.026888  | 1.183984  | C                | -0.441334 | 0.029004  | 0.080179  |
| C                | -0.893361 | -0.074370 | 2.377824  | C                | -0.642099 | -0.071973 | -1.402112 |
| N                | 0.462191  | -0.142385 | 2.235410  | N                | -1.303966 | 0.357187  | 1.077472  |
| N                | 2.923468  | -0.230522 | -1.793063 | C                | -0.568385 | 0.226557  | 2.211315  |
| H                | -1.385260 | -0.096810 | 3.347676  | N                | 0.708542  | -0.196436 | 1.956407  |
| H                | 1.149867  | -0.229724 | 2.976376  | N                | 2.604824  | 0.747701  | -1.662525 |
| H                | 3.790968  | -0.267433 | -1.264664 | H                | -0.931503 | 0.433965  | 3.215337  |
| H                | 2.886776  | -0.272872 | -2.822832 | H                | 1.435512  | -0.379383 | 2.641219  |
| H                | -1.501483 | 0.051650  | -1.791904 | H                | 3.545209  | 0.539515  | -1.350303 |
| O                | 1.820053  | -0.418327 | -4.346651 | H                | 2.460441  | 1.489829  | -2.339150 |

|                      |           |           |           |             |           |           |           |
|----------------------|-----------|-----------|-----------|-------------|-----------|-----------|-----------|
| H                    | -1.631693 | -0.053052 | -1.866910 | N           | 2.965292  | -0.126349 | -1.872200 |
| O                    | 1.191918  | 2.149048  | -3.794981 | H           | -1.499110 | -0.243657 | 3.217028  |
| H                    | 0.719775  | 1.324862  | -3.555365 | H           | 1.070422  | -0.159108 | 2.900343  |
| H                    | 1.272789  | 2.121888  | -4.756780 | H           | 3.780100  | 0.270209  | -1.412942 |
| 18                   |           |           |           | H           | 2.879020  | 0.063946  | -2.865889 |
| LWT TS S1 - C6 X     |           |           |           | H           | -1.503156 | 0.023667  | -1.909543 |
| N                    | 0.539880  | -0.106735 | -1.875795 | O           | 4.105438  | -0.677059 | 1.781623  |
| C                    | 1.786998  | 0.062673  | -1.334575 | H           | 4.293809  | -1.608724 | 1.606308  |
| N                    | 1.940297  | 0.008289  | -0.008580 | H           | 3.370822  | -0.447919 | 1.156808  |
| C                    | 0.732887  | -0.076564 | 0.691438  | O           | 2.506543  | -0.261388 | 3.976286  |
| C                    | -0.571987 | 0.015724  | 0.185977  | H           | 3.213997  | -0.406603 | 3.305745  |
| C                    | -0.683882 | 0.309001  | -1.249599 | H           | 2.807465  | 0.491813  | 4.499816  |
| N                    | -1.500340 | -0.009403 | 1.200075  | 21          |           |           |           |
| C                    | -0.769176 | -0.128802 | 2.318912  | 2W S1 (pp*) |           |           |           |
| N                    | 0.588531  | -0.164876 | 2.051833  | N           | 0.625813  | 0.010198  | -1.929179 |
| N                    | 2.868847  | 0.206355  | -2.169456 | C           | 1.732799  | 0.004866  | -1.145528 |
| H                    | -1.163569 | -0.219320 | 3.327421  | N           | 1.906328  | -0.019685 | 0.231971  |
| H                    | 1.341022  | -0.244158 | 2.727851  | C           | 0.665392  | -0.082191 | 0.809768  |
| H                    | 3.754412  | -0.060572 | -1.748208 | C           | -0.594456 | -0.031554 | 0.151450  |
| H                    | 2.728788  | -0.129435 | -3.117071 | C           | -0.615729 | 0.088626  | -1.315255 |
| H                    | -1.463465 | 0.888284  | -1.763553 | N           | -1.607251 | -0.083164 | 1.054349  |
| O                    | 1.542768  | -1.453985 | -4.228450 | C           | -0.978508 | -0.153830 | 2.267656  |
| H                    | 0.871095  | -1.388194 | -3.526600 | N           | 0.374615  | -0.141144 | 2.165452  |
| H                    | 1.040236  | -1.599489 | -5.040274 | N           | 2.908655  | 0.025806  | -1.827569 |
| 18                   |           |           |           | H           | -1.495510 | -0.209056 | 3.223305  |
| LWT TS S1 - S1 imino |           |           |           | H           | 1.072331  | -0.162557 | 2.931562  |
| N                    | 0.687063  | -0.148834 | -1.881602 | H           | 3.785033  | 0.080213  | -1.317850 |
| C                    | 1.824340  | -0.203189 | -1.120511 | H           | 2.882169  | 0.055910  | -2.842021 |
| N                    | 1.992544  | -0.189719 | 0.216711  | H           | -1.514033 | -0.017735 | -1.925290 |
| C                    | 0.742555  | -0.124848 | 0.816368  | O           | 4.113175  | -0.661621 | 1.758062  |
| C                    | -0.512965 | -0.033222 | 0.190766  | H           | 4.273791  | -1.606558 | 1.633163  |
| C                    | -0.566144 | 0.002508  | -1.264997 | H           | 3.354062  | -0.451379 | 1.149555  |
| N                    | -1.517933 | 0.036412  | 1.119557  | O           | 2.525453  | -0.254719 | 3.961685  |
| C                    | -0.879584 | -0.007941 | 2.313870  | H           | 3.232507  | -0.375700 | 3.284607  |
| N                    | 0.475737  | -0.097733 | 2.176361  | H           | 2.827488  | 0.475116  | 4.516558  |
| N                    | 2.959985  | -0.294348 | -1.890929 | 21          |           |           |           |
| H                    | -1.370811 | 0.022201  | 3.283772  | 2W C2 X     |           |           |           |
| H                    | 1.163580  | -0.146659 | 2.920271  | N           | 0.921494  | -0.495848 | -1.792585 |
| H                    | 3.826591  | -0.344590 | -1.349508 | C           | 2.016534  | -0.055260 | -0.924629 |
| H                    | 2.689309  | -0.282818 | -3.076422 | N           | 1.992912  | -0.570604 | 0.441122  |
| H                    | -1.466202 | -0.115303 | -1.869334 | C           | 0.843608  | -0.129958 | 0.950620  |
| O                    | 1.830839  | -0.309173 | -4.047886 | C           | -0.327880 | 0.136617  | 0.151305  |
| H                    | 1.052395  | -0.196508 | -3.163580 | C           | -0.238590 | -0.213191 | -1.271747 |
| H                    | 1.820995  | 0.496751  | -4.585562 | N           | -1.420256 | 0.326424  | 0.933806  |
| 21                   |           |           |           | C           | -0.945514 | 0.192259  | 2.198301  |
| 2W S0                |           |           |           | N           | 0.380262  | -0.111020 | 2.258611  |
| N                    | 0.700896  | 0.131407  | -1.804891 | N           | 2.180503  | 1.359054  | -0.976612 |
| C                    | 1.811970  | 0.090905  | -1.014277 | H           | -1.554531 | 0.302995  | 3.094209  |
| N                    | 1.857372  | -0.033556 | 0.329735  | H           | 0.964614  | -0.252980 | 3.108726  |
| C                    | 0.632959  | -0.081918 | 0.891269  | H           | 3.041527  | 1.639210  | -0.503266 |
| C                    | -0.597869 | -0.039933 | 0.188120  | H           | 2.190130  | 1.689949  | -1.943564 |
| C                    | -0.501127 | 0.060717  | -1.211051 | H           | -1.154319 | -0.410902 | -1.843984 |
| N                    | -1.671651 | -0.122513 | 1.064626  | O           | 3.903454  | -1.301956 | 2.353475  |
| C                    | -1.084536 | -0.207834 | 2.260173  | H           | 4.243812  | -2.194862 | 2.212519  |
| N                    | 0.296103  | -0.191733 | 2.218878  | H           | 3.316840  | -1.127714 | 1.573960  |
| N                    | 3.018513  | 0.246599  | -1.673994 | O           | 2.161085  | -0.600103 | 4.310965  |
| H                    | -1.618699 | -0.286956 | 3.205427  | H           | 2.883390  | -0.916001 | 3.712875  |
| H                    | 0.954503  | -0.200079 | 3.017972  | H           | 2.553564  | 0.142932  | 4.787683  |
| H                    | 3.848910  | -0.044363 | -1.171398 | 21          |           |           |           |
| H                    | 2.995117  | 0.034958  | -2.664547 | 2W C6 X     |           |           |           |
| H                    | -1.383285 | 0.083039  | -1.858097 | N           | 0.605292  | -0.503800 | -1.668761 |
| O                    | 4.003332  | -0.660520 | 2.013084  | C           | 1.875698  | -0.240084 | -1.081233 |
| H                    | 3.298164  | -0.448104 | 1.349935  | N           | 1.961793  | -0.280385 | 0.217961  |
| H                    | 4.222883  | -1.588654 | 1.858007  | C           | 0.680716  | -0.209830 | 0.851336  |
| O                    | 2.334365  | -0.229703 | 4.145030  | C           | -0.540885 | 0.080592  | 0.251834  |
| H                    | 3.069143  | -0.373534 | 3.503834  | C           | -0.491629 | 0.360386  | -1.204880 |
| H                    | 2.593777  | 0.547455  | 4.655677  | N           | -1.513775 | 0.303666  | 1.200079  |
| 21                   |           |           |           | C           | -0.871937 | 0.111360  | 2.367618  |
| 2W S1 (np*)          |           |           |           | N           | 0.457988  | -0.192942 | 2.203808  |
| N                    | 0.630784  | -0.184058 | -1.763687 | N           | 2.931063  | -0.125911 | -1.937344 |
| C                    | 1.805488  | -0.061054 | -1.134559 | H           | -1.335254 | 0.140132  | 3.350533  |
| N                    | 1.908972  | 0.019418  | 0.219972  | H           | 1.149057  | -0.341663 | 2.958568  |
| C                    | 0.653547  | -0.047869 | 0.801997  | H           | 3.862599  | -0.221468 | -1.543794 |
| C                    | -0.609881 | -0.000222 | 0.153208  | H           | 2.793979  | -0.495565 | -2.871980 |
| C                    | -0.637425 | 0.246435  | -1.279203 | H           | -0.486952 | 1.407771  | -1.554260 |
| N                    | -1.634377 | -0.106997 | 1.068509  | O           | 4.160707  | -0.779022 | 1.935821  |
| C                    | -1.006559 | -0.168933 | 2.249882  | H           | 4.425814  | -1.697428 | 1.791622  |
| N                    | 0.372945  | -0.125706 | 2.136958  | H           | 3.443826  | -0.612809 | 1.276792  |

|                  |           |           |           |          |           |           |           |
|------------------|-----------|-----------|-----------|----------|-----------|-----------|-----------|
| O                | 2.490346  | -0.600888 | 4.131413  | C        | -0.574536 | -0.067252 | 0.187381  |
| H                | 3.217382  | -0.636685 | 3.469084  | C        | -0.572835 | -0.016878 | -1.292291 |
| H                | 2.719611  | 0.122996  | 4.727965  | N        | -1.584942 | -0.109629 | 1.084012  |
| 21               |           |           |           | C        | -0.929755 | -0.160240 | 2.325371  |
| 2W S1 3H         |           |           |           | N        | 0.402586  | -0.173370 | 2.239245  |
| N                | 0.655748  | -0.018878 | -1.943599 | N        | 2.967459  | 0.013141  | -1.763776 |
| C                | 1.742691  | -0.018071 | -1.200314 | H        | -1.471346 | -0.194457 | 3.268903  |
| N                | 1.777913  | 0.032298  | 0.206613  | H        | 1.350417  | -0.197775 | 3.067131  |
| C                | 0.534804  | 0.032676  | 0.801516  | H        | 3.833327  | 0.045903  | -1.236417 |
| C                | -0.637022 | -0.016383 | 0.082163  | H        | 2.966968  | 0.120140  | -2.771942 |
| C                | -0.597661 | -0.044522 | -1.365757 | H        | -1.464961 | 0.115103  | -1.906069 |
| N                | -1.638003 | -0.226121 | 1.039690  | O        | 3.846068  | -0.573692 | 1.731020  |
| C                | -1.037053 | -0.025611 | 2.296070  | H        | 4.155553  | -1.490685 | 1.703933  |
| N                | 0.282640  | -0.019674 | 2.206694  | H        | 2.905819  | -0.388545 | 0.907943  |
| N                | 3.003221  | -0.141070 | -1.781088 | O        | 2.424757  | -0.283236 | 3.668683  |
| H                | -1.606070 | -0.060917 | 3.222343  | H        | 3.202643  | -0.422592 | 2.782817  |
| H                | 1.681477  | -0.220779 | 3.463624  | H        | 2.627612  | 0.531122  | 4.150054  |
| H                | 3.731112  | 0.408049  | -1.327272 | 21       |           |           |           |
| H                | 2.965512  | 0.006269  | -2.786419 | 2WT S0   |           |           |           |
| H                | -1.476088 | -0.037960 | -2.011645 | N        | 0.619258  | -0.023284 | -1.842144 |
| O                | 4.062203  | -0.680799 | 1.685499  | C        | 1.765881  | -0.121559 | -1.094664 |
| H                | 4.413097  | -1.579355 | 1.637843  | N        | 1.843707  | -0.187581 | 0.252901  |
| H                | 2.626351  | -0.285034 | 0.712111  | C        | 0.637718  | -0.124040 | 0.845091  |
| O                | 2.531621  | -0.368667 | 3.937067  | C        | -0.614793 | -0.007155 | 0.192428  |
| H                | 3.665110  | -0.607029 | 2.583798  | C        | -0.564194 | 0.032372  | -1.210179 |
| H                | 2.638002  | 0.400831  | 4.510779  | N        | -1.655150 | 0.033865  | 1.112858  |
| 21               |           |           |           | C        | -1.031595 | -0.056056 | 2.288126  |
| 2W TS S1 - C2 X  |           |           |           | N        | 0.343412  | -0.155438 | 2.188120  |
| N                | 0.447442  | -0.054648 | -2.158660 | N        | 2.944805  | -0.106916 | -1.799941 |
| C                | 1.619913  | -0.158946 | -1.425109 | H        | -1.531812 | -0.053700 | 3.254706  |
| N                | 1.777669  | -0.942327 | -0.206008 | H        | 1.048695  | -0.239040 | 2.923240  |
| C                | 0.832828  | -0.321867 | 0.577224  | H        | 3.770607  | -0.414028 | -1.302908 |
| C                | -0.441334 | 0.029004  | 0.080179  | H        | 2.886666  | -0.293450 | -2.800074 |
| C                | -0.642099 | -0.071973 | -1.402112 | H        | -1.463089 | 0.104332  | -1.829927 |
| N                | -1.303966 | 0.357187  | 1.077472  | O        | 3.061763  | -0.291274 | 2.830074  |
| C                | -0.568385 | 0.226557  | 2.211315  | H        | 3.018748  | -0.307853 | 1.851134  |
| N                | 0.708542  | -0.196436 | 1.956407  | H        | 3.777394  | -0.893951 | 3.066855  |
| N                | 2.604824  | 0.747701  | -1.662525 | O        | 1.654122  | -0.480639 | -4.447600 |
| H                | -0.931503 | 0.433965  | 3.215337  | H        | 1.050637  | -0.250078 | -3.707641 |
| H                | 1.435512  | -0.379383 | 2.641219  | H        | 1.510710  | 0.207622  | -5.109328 |
| H                | 3.545209  | 0.539515  | -1.350303 | 21       |           |           |           |
| H                | 2.460441  | 1.489829  | -2.339150 | 2WT S1   |           |           |           |
| H                | -1.631693 | -0.053052 | -1.866910 | N        | 0.567190  | -0.120621 | -1.917094 |
| O                | 4.066992  | -1.744233 | 1.098453  | C        | 1.707698  | -0.198363 | -1.174662 |
| H                | 4.243358  | -2.685572 | 0.971037  | N        | 1.918694  | -0.206217 | 0.189880  |
| H                | 3.264263  | -1.556582 | 0.542001  | C        | 0.693628  | -0.156497 | 0.807829  |
| O                | 2.984466  | -0.859314 | 3.456107  | C        | -0.579725 | -0.016591 | 0.203258  |
| H                | 3.495816  | -1.215602 | 2.690950  | C        | -0.647193 | 0.062204  | -1.261318 |
| H                | 3.583024  | -0.237377 | 3.887830  | N        | -1.555993 | 0.052503  | 1.148086  |
| 21               |           |           |           | C        | -0.889219 | -0.037467 | 2.337093  |
| 2W TS S1 - C6 X  |           |           |           | N        | 0.453861  | -0.149751 | 2.175175  |
| N                | 0.539880  | -0.106735 | -1.875795 | N        | 2.853235  | -0.285116 | -1.899018 |
| C                | 1.786998  | 0.062673  | -1.334575 | H        | -1.367740 | -0.020858 | 3.313660  |
| N                | 1.940297  | 0.008289  | -0.008580 | H        | 1.194825  | -0.238074 | 2.875569  |
| C                | 0.732887  | -0.076564 | 0.691438  | H        | 3.732046  | -0.335624 | -1.392507 |
| C                | -0.571987 | 0.015724  | 0.185977  | H        | 2.799726  | -0.285892 | -2.928770 |
| C                | -0.683882 | 0.309001  | -1.249599 | H        | -1.570723 | 0.005719  | -1.839606 |
| N                | -1.500340 | -0.009403 | 1.200075  | O        | 3.205626  | -0.364569 | 2.717337  |
| C                | -0.769176 | -0.128802 | 2.318912  | H        | 3.763788  | -1.130880 | 2.900439  |
| N                | 0.588531  | -0.164876 | 2.051833  | H        | 3.097843  | -0.355602 | 1.741798  |
| N                | 2.868847  | 0.206355  | -2.169456 | O        | 1.720141  | -0.363013 | -4.441465 |
| H                | -1.163569 | -0.219320 | 3.327421  | H        | 1.026317  | -0.243219 | -3.747966 |
| H                | 1.341022  | -0.244158 | 2.727851  | H        | 1.536086  | 0.310452  | -5.108623 |
| H                | 3.754412  | -0.060572 | -1.748208 | 21       |           |           |           |
| H                | 2.728788  | -0.129435 | -3.117071 | 2WT C2 X |           |           |           |
| H                | -1.463465 | 0.888284  | -1.763553 | N        | 0.660558  | -0.380123 | -1.856382 |
| O                | 4.236668  | -0.946549 | 1.260321  | C        | 1.854980  | -0.029882 | -1.064436 |
| H                | 4.258566  | -1.901615 | 1.111386  | N        | 1.887339  | -0.583508 | 0.282847  |
| H                | 3.445602  | -0.632033 | 0.755133  | C        | 0.809963  | -0.083830 | 0.883757  |
| O                | 2.931338  | -0.405777 | 3.645238  | C        | -0.406726 | 0.253904  | 0.190608  |
| H                | 3.554528  | -0.579332 | 2.904664  | C        | -0.440393 | -0.056873 | -1.243634 |
| H                | 3.323713  | 0.325500  | 4.138331  | N        | -1.436236 | 0.419429  | 1.061311  |
| 21               |           |           |           | C        | -0.880069 | 0.210026  | 2.279533  |
| 2W TS S1 - S1 3H |           |           |           | N        | 0.440198  | -0.120659 | 2.222341  |
| N                | 0.665823  | 0.054228  | -1.885180 | N        | 2.086634  | 1.373209  | -1.095077 |
| C                | 1.771413  | -0.017360 | -1.120659 | H        | -1.426019 | 0.287189  | 3.217884  |
| N                | 1.892498  | -0.127584 | 0.264924  | H        | 1.091302  | -0.377747 | 2.970761  |
| C                | 0.656868  | -0.107178 | 0.864994  | H        | 2.960948  | 1.601645  | -0.618774 |

|              |           |           |           |                      |           |           |           |
|--------------|-----------|-----------|-----------|----------------------|-----------|-----------|-----------|
| H            | 2.124030  | 1.705046  | -2.061432 | 2WT TS S1 - C2 X     |           |           |           |
| H            | -1.405654 | -0.182538 | -1.753259 | N                    | 0.447442  | -0.054648 | -2.158660 |
| O            | 2.982238  | -1.028961 | 2.855125  | C                    | 1.619913  | -0.158946 | -1.425109 |
| H            | 3.465747  | -1.814301 | 3.141368  | N                    | 1.777669  | -0.942327 | -0.206008 |
| H            | 2.953563  | -1.086076 | 1.876509  | C                    | 0.832828  | -0.321867 | 0.577224  |
| O            | 1.876477  | -0.207308 | -4.497243 | C                    | -0.441334 | 0.029004  | 0.080179  |
| H            | 1.366581  | -0.459812 | -3.704552 | C                    | -0.642099 | -0.071973 | -1.402112 |
| H            | 1.284740  | -0.404438 | -5.233716 | N                    | -1.303966 | 0.357187  | 1.077472  |
| 21           |           |           |           | C                    | -0.568385 | 0.226557  | 2.211315  |
| 2WT C6 X     |           |           |           | N                    | 0.708542  | -0.196436 | 1.956407  |
| N            | 0.594280  | -0.399158 | -1.742117 | N                    | 2.604824  | 0.747701  | -1.662525 |
| C            | 1.858834  | -0.206518 | -1.100219 | H                    | -0.931503 | 0.433965  | 3.215337  |
| N            | 1.883541  | -0.288864 | 0.203856  | H                    | 1.435512  | -0.379383 | 2.641219  |
| C            | 0.581206  | -0.196312 | 0.773417  | H                    | 3.545209  | 0.539515  | -1.350303 |
| C            | -0.614619 | 0.142248  | 0.147670  | H                    | 2.460441  | 1.489829  | -2.339150 |
| C            | -0.502756 | 0.473495  | -1.291582 | H                    | -1.631693 | -0.053052 | -1.866910 |
| N            | -1.604682 | 0.381011  | 1.077353  | O                    | 3.345366  | -1.196530 | 2.143609  |
| C            | -1.006850 | 0.150009  | 2.258391  | H                    | 3.834215  | -2.001403 | 2.356332  |
| N            | 0.317718  | -0.197166 | 2.117464  | H                    | 3.069174  | -1.305610 | 1.207710  |
| N            | 2.943038  | -0.158032 | -1.897826 | O                    | 1.344235  | 2.020415  | -3.927822 |
| H            | -1.493192 | 0.186316  | 3.229822  | H                    | 0.781058  | 1.282282  | -3.617492 |
| H            | 1.016719  | -0.402256 | 2.834576  | H                    | 0.731425  | 2.747119  | -4.097773 |
| H            | 3.863090  | -0.189523 | -1.477439 | 21                   |           |           |           |
| H            | 2.814087  | -0.191213 | -2.908239 | 2WT TS S1 - C6 X     |           |           |           |
| H            | -0.457508 | 1.532617  | -1.599768 | N                    | 0.539880  | -0.106735 | -1.875795 |
| O            | 3.039250  | -0.680839 | 2.806037  | C                    | 1.786998  | 0.062673  | -1.334575 |
| H            | 3.480179  | -1.527852 | 2.949595  | N                    | 1.940297  | 0.008289  | -0.008580 |
| H            | 2.981010  | -0.591775 | 1.831755  | C                    | 0.732887  | -0.076564 | 0.691438  |
| O            | 1.512102  | -0.262846 | -4.386309 | C                    | -0.571987 | 0.015724  | 0.185977  |
| H            | 0.768559  | -0.711087 | -3.951604 | C                    | -0.683882 | 0.309001  | -1.249599 |
| H            | 1.415544  | -0.456734 | -5.328276 | N                    | -1.500340 | -0.009403 | 1.200075  |
| 21           |           |           |           | C                    | -0.769176 | -0.128802 | 2.318912  |
| 2WT S1 3H    |           |           |           | N                    | 0.588531  | -0.164876 | 2.051833  |
| N            | 0.611173  | -0.080910 | -1.830314 | N                    | 2.868847  | 0.206355  | -2.169456 |
| C            | 1.691956  | -0.332231 | -1.109889 | H                    | -1.163569 | -0.219320 | 3.327421  |
| N            | 1.692508  | -0.530764 | 0.282188  | H                    | 1.341022  | -0.244158 | 2.727851  |
| C            | 0.460450  | -0.378102 | 0.887054  | H                    | 3.754412  | -0.060572 | -1.748208 |
| C            | -0.681162 | -0.066449 | 0.192208  | H                    | 2.728788  | -0.129435 | -3.117071 |
| C            | -0.627513 | 0.096597  | -1.246146 | H                    | -1.463465 | 0.888284  | -1.763553 |
| N            | -1.631676 | 0.222995  | 1.180603  | O                    | 3.394515  | -0.125765 | 2.465330  |
| C            | -1.074883 | -0.181470 | 2.406607  | H                    | 4.101240  | -0.773980 | 2.576869  |
| N            | 0.226040  | -0.394153 | 2.297044  | H                    | 3.241781  | -0.080965 | 1.499237  |
| N            | 2.948995  | -0.368089 | -1.690481 | O                    | 1.551067  | -1.408941 | -4.250440 |
| H            | -1.629275 | -0.125575 | 3.340425  | H                    | 0.860953  | -1.382691 | -3.564972 |
| H            | 2.138545  | -0.202160 | 3.041158  | H                    | 1.073927  | -1.541794 | -5.079657 |
| H            | 3.573978  | -1.071895 | -1.305573 | 21                   |           |           |           |
| H            | 2.914771  | -0.360961 | -2.713260 | 2WT TS S1 - S1 3H    |           |           |           |
| H            | -1.486500 | 0.299646  | -1.886215 | N                    | 0.635175  | 0.044663  | -1.818664 |
| O            | 3.051701  | -0.059819 | 2.727437  | C                    | 1.748680  | -0.086847 | -1.069417 |
| H            | 3.623201  | -0.431320 | 3.410652  | N                    | 1.880321  | -0.184900 | 0.317395  |
| H            | 2.537445  | -0.366806 | 0.841286  | C                    | 0.636401  | -0.082016 | 0.893851  |
| O            | 1.761627  | -0.228000 | -4.401096 | C                    | -0.602426 | 0.021169  | 0.254021  |
| H            | 1.127069  | -0.101365 | -3.658306 | C                    | -0.605524 | 0.070518  | -1.222291 |
| H            | 1.667702  | 0.564814  | -4.944089 | N                    | -1.583609 | -0.007871 | 1.191015  |
| 21           |           |           |           | C                    | -0.886033 | -0.107672 | 2.415614  |
| 2WT S1 imino |           |           |           | N                    | 0.438039  | -0.172844 | 2.282459  |
| N            | 0.718248  | -0.112807 | -1.812595 | N                    | 2.926906  | -0.147852 | -1.745664 |
| C            | 1.868940  | -0.209239 | -1.082810 | H                    | -1.405253 | -0.132220 | 3.371772  |
| N            | 1.968528  | -0.227303 | 0.230776  | H                    | 1.686427  | -0.351789 | 2.751435  |
| C            | 0.689544  | -0.140028 | 0.831644  | H                    | 3.804980  | -0.161773 | -1.242455 |
| C            | -0.540876 | -0.015050 | 0.194383  | H                    | 2.906649  | -0.041639 | -2.753276 |
| C            | -0.569418 | 0.052859  | -1.251430 | H                    | -1.483469 | 0.267753  | -1.839353 |
| N            | -1.561003 | 0.050135  | 1.113526  | O                    | 2.840945  | -0.444863 | 2.545803  |
| C            | -0.934217 | -0.033085 | 2.308138  | H                    | 3.131556  | -1.341267 | 2.775932  |
| N            | 0.422074  | -0.143836 | 2.184611  | H                    | 2.691037  | -0.378346 | 1.391045  |
| N            | 3.015632  | -0.298635 | -1.887309 | O                    | 1.818573  | 0.079959  | -4.351595 |
| H            | -1.434401 | -0.015719 | 3.273430  | H                    | 1.134622  | 0.124561  | -3.641463 |
| H            | 1.140375  | -0.230243 | 2.906555  | H                    | 1.623114  | 0.819626  | -4.940447 |
| H            | 3.812933  | -0.364900 | -1.234181 | 21                   |           |           |           |
| H            | 2.552121  | -0.275285 | -3.878023 | 2WT TS S1 - S1 imino |           |           |           |
| H            | -1.433143 | -0.085087 | -1.901739 | N                    | 0.617394  | -0.158244 | -1.944122 |
| O            | 3.179292  | -0.367012 | 2.815619  | C                    | 1.766426  | -0.242333 | -1.205133 |
| H            | 3.749125  | -1.114492 | 3.035994  | N                    | 1.941777  | -0.247431 | 0.135891  |
| H            | 3.101414  | -0.384049 | 1.839187  | C                    | 0.700514  | -0.160049 | 0.752946  |
| O            | 1.769775  | -0.313401 | -4.463533 | C                    | -0.559361 | -0.036404 | 0.139885  |
| H            | 0.843447  | -0.118975 | -2.835416 | C                    | -0.626426 | 0.004989  | -1.316399 |
| H            | 1.917533  | 0.360937  | -5.139178 | N                    | -1.546426 | 0.055396  | 1.080596  |
| 21           |           |           |           | C                    | -0.887646 | -0.007341 | 2.269107  |

|         |           |           |           |                 |           |           |           |
|---------|-----------|-----------|-----------|-----------------|-----------|-----------|-----------|
| N       | 0.457767  | -0.129074 | 2.117213  | H               | 1.243048  | -0.397081 | 2.812488  |
| N       | 2.886326  | -0.339824 | -1.989570 | H               | 2.982852  | 1.529819  | -0.859129 |
| H       | -1.368686 | 0.033497  | 3.243628  | H               | 1.974661  | 1.869065  | -2.145991 |
| H       | 1.192685  | -0.202454 | 2.824466  | H               | -1.580938 | 0.079749  | -1.796180 |
| H       | 3.762737  | -0.405347 | -1.467486 | O               | 4.498598  | -0.980947 | 0.600791  |
| H       | 2.593559  | -0.310200 | -3.177865 | H               | 3.536485  | -1.027848 | 0.366689  |
| H       | -1.532980 | -0.077406 | -1.916429 | H               | 4.873806  | -1.824954 | 0.319498  |
| O       | 3.219309  | -0.338573 | 2.684894  | O               | 2.343033  | -0.266265 | 4.146500  |
| H       | 3.785222  | -1.090605 | 2.900174  | H               | 3.282663  | -0.241833 | 3.842462  |
| H       | 3.117276  | -0.366913 | 1.710190  | H               | 2.249500  | 0.549751  | 4.655054  |
| O       | 1.727415  | -0.313933 | -4.128568 | O               | 4.864911  | -0.053125 | 3.149797  |
| H       | 0.964228  | -0.197541 | -3.235089 | H               | 5.648421  | -0.466849 | 3.532162  |
| H       | 1.727333  | 0.498429  | -4.656713 | H               | 4.817825  | -0.394727 | 2.225722  |
| 24      |           |           |           | 24              |           |           |           |
| 3W S0   |           |           |           | 3W C6 X         |           |           |           |
| N       | 0.441004  | 0.247043  | -2.048708 | N               | 0.457865  | -0.420300 | -1.837675 |
| C       | 1.623576  | 0.207153  | -1.368585 | C               | 1.750561  | -0.183023 | -1.294252 |
| N       | 1.798302  | 0.028357  | -0.039665 | N               | 1.882897  | -0.246644 | 0.002052  |
| C       | 0.636263  | -0.079930 | 0.633425  | C               | 0.636980  | -0.186099 | 0.694077  |
| C       | -0.655844 | -0.046611 | 0.049329  | C               | -0.608893 | 0.103365  | 0.151420  |
| C       | -0.695823 | 0.113922  | -1.347270 | C               | -0.620427 | 0.427728  | -1.299533 |
| N       | -1.640014 | -0.197832 | 1.016936  | N               | -1.545796 | 0.284607  | 1.142331  |
| C       | -0.940487 | -0.313845 | 2.147806  | C               | -0.856625 | 0.067318  | 2.278137  |
| N       | 0.429883  | -0.256162 | 1.979740  | N               | 0.468461  | -0.218257 | 2.052626  |
| N       | 2.759366  | 0.418873  | -2.127500 | N               | 2.787842  | -0.082243 | -2.172668 |
| H       | -1.381789 | -0.445931 | 3.134268  | H               | -1.283881 | 0.060940  | 3.278105  |
| H       | 1.143458  | -0.257085 | 2.732645  | H               | 1.196330  | -0.321794 | 2.782334  |
| H       | 3.640975  | 0.129695  | -1.716100 | H               | 3.717978  | -0.244746 | -1.791849 |
| H       | 2.645958  | 0.258772  | -3.121266 | H               | 2.610438  | -0.434162 | -3.107183 |
| H       | -1.636397 | 0.134589  | -1.906315 | H               | -0.617384 | 1.488734  | -1.608065 |
| O       | 4.353495  | -0.860261 | 0.502611  | O               | 4.498872  | -0.957551 | 0.476946  |
| H       | 3.418559  | -0.534166 | 0.406607  | H               | 3.529433  | -0.741510 | 0.438416  |
| H       | 4.282733  | -1.818891 | 0.397893  | H               | 4.528696  | -1.923797 | 0.488423  |
| O       | 2.291415  | -0.171553 | 4.069338  | O               | 2.359952  | -0.225784 | 4.147016  |
| H       | 3.235264  | -0.166228 | 3.782353  | H               | 3.290922  | -0.186413 | 3.829529  |
| H       | 2.207949  | 0.620885  | 4.615146  | H               | 2.250269  | 0.590795  | 4.650567  |
| O       | 4.834785  | -0.068492 | 3.090847  | O               | 4.899371  | -0.057568 | 3.096332  |
| H       | 5.611893  | -0.499167 | 3.466196  | H               | 5.670852  | -0.487674 | 3.484709  |
| H       | 4.789545  | -0.372279 | 2.155080  | H               | 4.880976  | -0.354913 | 2.160362  |
| 24      |           |           |           | 24              |           |           |           |
| 3W S1   |           |           |           | 3W S1 3H        |           |           |           |
| N       | 0.548406  | 0.193852  | -1.961483 | N               | 0.540546  | 0.239484  | -2.016347 |
| C       | 1.684884  | 0.000329  | -1.244617 | C               | 1.658489  | 0.130605  | -1.325894 |
| N       | 1.887319  | -0.267014 | 0.100101  | N               | 1.754003  | 0.027600  | 0.084299  |
| C       | 0.682112  | -0.145023 | 0.740169  | C               | 0.535124  | -0.052090 | 0.721892  |
| C       | -0.598142 | -0.063173 | 0.128789  | C               | -0.667862 | 0.020754  | 0.055573  |
| C       | -0.672136 | -0.063490 | -1.343732 | C               | -0.685704 | 0.195265  | -1.388054 |
| N       | -1.577292 | -0.009337 | 1.071508  | N               | -1.641409 | -0.304331 | 0.999992  |
| C       | -0.906808 | -0.077220 | 2.255571  | C               | -0.967486 | -0.316822 | 2.245542  |
| N       | 0.442604  | -0.186062 | 2.101804  | N               | 0.344727  | -0.293149 | 2.117422  |
| N       | 2.835853  | 0.084311  | -1.960854 | N               | 2.885546  | 0.186688  | -1.951708 |
| H       | -1.384097 | -0.063667 | 3.233286  | H               | -1.502201 | -0.466785 | 3.181400  |
| H       | 1.158497  | -0.184097 | 2.852213  | H               | 1.686402  | -0.128876 | 3.395776  |
| H       | 3.728858  | -0.104468 | -1.505672 | H               | 3.676734  | -0.215821 | -1.453812 |
| H       | 2.769816  | 0.296439  | -2.951512 | H               | 2.851033  | 0.045829  | -2.955211 |
| H       | -1.584264 | 0.192020  | -1.889194 | H               | -1.589927 | 0.319798  | -1.984940 |
| O       | 4.452261  | -1.033426 | 0.414471  | O               | 4.312373  | -1.150269 | 0.462922  |
| H       | 3.468329  | -0.839634 | 0.442750  | H               | 2.598082  | -0.430701 | 0.459456  |
| H       | 4.508418  | -1.997448 | 0.360769  | H               | 4.385661  | -2.112620 | 0.496333  |
| O       | 2.414316  | -0.097278 | 4.101629  | O               | 2.424825  | 0.063690  | 4.020305  |
| H       | 3.329322  | -0.097790 | 3.735176  | H               | 4.043022  | -0.094511 | 3.365325  |
| H       | 2.382592  | 0.694901  | 4.653101  | H               | 2.237927  | 0.956036  | 4.340213  |
| O       | 4.909372  | -0.028261 | 2.954099  | O               | 4.914009  | -0.170113 | 2.908723  |
| H       | 5.695339  | -0.415048 | 3.358317  | H               | 5.520902  | -0.528274 | 3.567370  |
| H       | 4.874050  | -0.401181 | 2.044407  | H               | 4.657713  | -0.841756 | 1.336205  |
| 24      |           |           |           | 24              |           |           |           |
| 3W C2 X |           |           |           | 3W TS S1 - C2 X |           |           |           |
| N       | 0.459221  | -0.171692 | -2.073513 | N               | 0.447442  | -0.054648 | -2.158660 |
| C       | 1.706020  | 0.038119  | -1.327482 | C               | 1.619913  | -0.158946 | -1.425109 |
| N       | 1.811733  | -0.661360 | -0.047606 | N               | 1.777669  | -0.942327 | -0.206008 |
| C       | 0.809485  | -0.175991 | 0.689683  | C               | 0.832828  | -0.321867 | 0.577224  |
| C       | -0.438689 | 0.255234  | 0.111475  | C               | -0.441334 | 0.029004  | 0.080179  |
| C       | -0.581136 | 0.112087  | -1.344624 | C               | -0.642099 | -0.071973 | -1.402112 |
| N       | -1.393017 | 0.408071  | 1.064543  | N               | -1.303966 | 0.357187  | 1.077472  |
| C       | -0.749649 | 0.107102  | 2.221821  | C               | -0.568385 | 0.226557  | 2.211315  |
| N       | 0.545538  | -0.277292 | 2.048732  | N               | 0.708542  | -0.196436 | 1.956407  |
| N       | 2.035133  | 1.421044  | -1.229018 | N               | 2.604824  | 0.747701  | -1.662525 |
| H       | -1.211282 | 0.146834  | 3.208157  | H               | -0.931503 | 0.433965  | 3.215337  |

|               |           |           |           |           |           |           |           |
|---------------|-----------|-----------|-----------|-----------|-----------|-----------|-----------|
| H             | 1.435512  | -0.379383 | 2.641219  | H         | 1.086828  | -0.007800 | 2.926933  |
| H             | 3.545209  | 0.539515  | -1.350303 | H         | 3.745213  | -0.170062 | -1.316044 |
| H             | 2.460441  | 1.489829  | -2.339150 | H         | 2.849289  | -0.108629 | -2.871628 |
| H             | -1.631693 | -0.053052 | -1.866910 | H         | -1.557203 | -0.198670 | -1.886441 |
| O             | 4.476722  | -1.029687 | 0.014440  | O         | 4.095891  | -0.773786 | 1.787748  |
| H             | 3.483927  | -1.157036 | 0.043101  | H         | 4.259262  | -1.726292 | 1.773088  |
| H             | 4.821842  | -1.856886 | -0.347520 | H         | 3.333380  | -0.636311 | 1.165266  |
| O             | 2.724017  | -0.659362 | 3.859373  | O         | 2.559121  | -0.005968 | 3.932812  |
| H             | 3.614182  | -0.503356 | 3.464667  | H         | 3.247256  | -0.257721 | 3.272711  |
| H             | 2.732860  | -0.165756 | 4.688685  | H         | 2.902819  | 0.783891  | 4.368539  |
| O             | 5.095061  | -0.203031 | 2.565240  | O         | 1.810558  | -0.150574 | -4.418748 |
| H             | 5.908311  | -0.625772 | 2.867032  | H         | 1.091019  | -0.126796 | -3.742598 |
| H             | 4.971024  | -0.522978 | 1.641973  | H         | 1.589555  | 0.539543  | -5.056944 |
| 24            |           |           |           | 24        |           |           |           |
| 3WT S1 - C6 X |           |           |           | 3WT C2 X  |           |           |           |
| N             | 0.539880  | -0.106735 | -1.875795 | N         | 0.870149  | -0.497173 | -1.770173 |
| C             | 1.786998  | 0.062673  | -1.334575 | C         | 1.991695  | -0.055248 | -0.920473 |
| N             | 1.940297  | 0.008289  | -0.008580 | N         | 1.964446  | -0.548598 | 0.448272  |
| C             | 0.732887  | -0.076564 | 0.691438  | C         | 0.827234  | -0.086803 | 0.970146  |
| C             | -0.571987 | 0.015724  | 0.185977  | C         | -0.354897 | 0.161026  | 0.180491  |
| C             | -0.683882 | 0.309001  | -1.249599 | C         | -0.281624 | -0.205103 | -1.237509 |
| N             | -1.500340 | -0.009403 | 1.200075  | N         | -1.447088 | 0.316466  | 0.970776  |
| C             | -0.769176 | -0.128802 | 2.318912  | C         | -0.960599 | 0.189833  | 2.232048  |
| N             | 0.588531  | -0.164876 | 2.051833  | N         | 0.373205  | -0.082748 | 2.283861  |
| N             | 2.868847  | 0.206355  | -2.169456 | N         | 2.166520  | 1.351091  | -1.000793 |
| H             | -1.163569 | -0.219320 | 3.327421  | H         | -1.565532 | 0.285060  | 3.133145  |
| H             | 1.341022  | -0.244158 | 2.727851  | H         | 0.966946  | -0.221520 | 3.132115  |
| H             | 3.754412  | -0.060572 | -1.748208 | H         | 3.009057  | 1.633493  | -0.497925 |
| H             | 2.728788  | -0.129435 | -3.117071 | H         | 2.221920  | 1.660170  | -1.973987 |
| H             | -1.463465 | 0.888284  | -1.763553 | H         | -1.203954 | -0.392432 | -1.803410 |
| O             | 4.462897  | -1.012440 | 0.378904  | O         | 3.887064  | -1.318393 | 2.334493  |
| H             | 3.524948  | -0.681645 | 0.370133  | H         | 4.248767  | -2.203687 | 2.201331  |
| H             | 4.374499  | -1.975636 | 0.375987  | H         | 3.297970  | -1.156133 | 1.556342  |
| O             | 2.641983  | -0.266403 | 4.008413  | O         | 2.175691  | -0.582159 | 4.308619  |
| H             | 3.565745  | -0.204260 | 3.673727  | H         | 2.896298  | -0.901861 | 3.712245  |
| H             | 2.574542  | 0.452642  | 4.649440  | H         | 2.580911  | 0.119412  | 4.834176  |
| O             | 5.148050  | -0.059483 | 2.887984  | O         | 1.877859  | -0.196137 | -4.490857 |
| H             | 5.940468  | -0.488459 | 3.232719  | H         | 1.452547  | -0.504341 | -3.667605 |
| H             | 5.039880  | -0.408150 | 1.975114  | H         | 1.232165  | -0.388176 | -5.182427 |
| 24            |           |           |           | 24        |           |           |           |
| 3WT S0        |           |           |           | 3WT C6 X  |           |           |           |
| N             | 0.648008  | -0.053572 | -1.803452 | N         | 0.665145  | -0.396820 | -1.756779 |
| C             | 1.779865  | -0.053627 | -1.029048 | C         | 1.915491  | -0.149558 | -1.114690 |
| N             | 1.827519  | -0.095250 | 0.321493  | N         | 1.942589  | -0.245231 | 0.189386  |
| C             | 0.609679  | -0.099308 | 0.895826  | C         | 0.646458  | -0.201402 | 0.777827  |
| C             | -0.629800 | -0.087430 | 0.206239  | C         | -0.559919 | 0.095716  | 0.148602  |
| C             | -0.549133 | -0.075979 | -1.195245 | C         | -0.459801 | 0.429550  | -1.292002 |
| N             | -1.694242 | -0.102778 | 1.097635  | N         | -1.552215 | 0.328465  | 1.076626  |
| C             | -1.093877 | -0.122722 | 2.288925  | C         | -0.939300 | 0.138940  | 2.257991  |
| N             | 0.287293  | -0.123405 | 2.230476  | N         | 0.393413  | -0.177411 | 2.124072  |
| N             | 2.970169  | 0.029303  | -1.703134 | N         | 2.996208  | -0.011629 | -1.907371 |
| H             | -1.618062 | -0.136738 | 3.242778  | H         | -1.424663 | 0.170830  | 3.230583  |
| H             | 0.956268  | -0.118032 | 3.021055  | H         | 1.082540  | -0.280412 | 2.886524  |
| H             | 3.821673  | -0.116908 | -1.178173 | H         | 3.913348  | -0.011705 | -1.478554 |
| H             | 2.963258  | -0.136211 | -2.707836 | H         | 2.873255  | -0.102365 | -2.914080 |
| H             | -1.437317 | -0.087372 | -1.834163 | H         | -0.443096 | 1.493509  | -1.588940 |
| O             | 4.013612  | -0.603105 | 1.988362  | O         | 4.123158  | -0.683507 | 1.861365  |
| H             | 3.292953  | -0.431090 | 1.330356  | H         | 3.387398  | -0.552081 | 1.210443  |
| H             | 4.271067  | -1.522775 | 1.841007  | H         | 4.407918  | -1.597598 | 1.729535  |
| O             | 2.348686  | -0.199038 | 4.127643  | O         | 2.459553  | -0.400519 | 4.049124  |
| H             | 3.080365  | -0.336824 | 3.481230  | H         | 3.194348  | -0.471261 | 3.397931  |
| H             | 2.639533  | 0.531368  | 4.687734  | H         | 2.683028  | 0.356152  | 4.605705  |
| O             | 1.803279  | -0.412850 | -4.372593 | O         | 1.629534  | -0.410842 | -4.418599 |
| H             | 1.151791  | -0.237046 | -3.658718 | H         | 0.837979  | -0.722677 | -3.949814 |
| H             | 1.612381  | 0.244063  | -5.053778 | H         | 1.300723  | 0.055986  | -5.197944 |
| 24            |           |           |           | 24        |           |           |           |
| 3WT S1        |           |           |           | 3WT S1 3H |           |           |           |
| N             | 0.581590  | -0.186023 | -1.916872 | N         | 0.606699  | -0.219869 | -1.916252 |
| C             | 1.708684  | -0.202671 | -1.151245 | C         | 1.706758  | -0.213997 | -1.178904 |
| N             | 1.880391  | -0.244828 | 0.218373  | N         | 1.734052  | -0.109394 | 0.221183  |
| C             | 0.648212  | -0.145312 | 0.815090  | C         | 0.496542  | -0.038348 | 0.819901  |
| C             | -0.614860 | -0.192733 | 0.175927  | C         | -0.680900 | -0.092315 | 0.111304  |
| C             | -0.651779 | -0.322897 | -1.289097 | C         | -0.648280 | -0.193904 | -1.334312 |
| N             | -1.617920 | -0.130837 | 1.090021  | N         | -1.686418 | -0.232341 | 1.073665  |
| C             | -0.973935 | -0.051700 | 2.293950  | C         | -1.060624 | -0.003223 | 2.319573  |
| N             | 0.377282  | -0.075052 | 2.174515  | N         | 0.255735  | -0.020655 | 2.230112  |
| N             | 2.876201  | -0.168630 | -1.843038 | N         | 2.947009  | -0.378449 | -1.754890 |
| H             | -1.478591 | 0.016693  | 3.255246  | H         | -1.626655 | 0.022254  | 3.248233  |



|                  |           |           |           |                      |           |           |           |
|------------------|-----------|-----------|-----------|----------------------|-----------|-----------|-----------|
| H                | 1.700854  | -0.083827 | 3.450525  | H                    | 1.341022  | -0.244158 | 2.727851  |
| H                | 3.732065  | 0.023639  | -1.251496 | H                    | 3.754412  | -0.060572 | -1.748208 |
| H                | 2.959912  | -0.277501 | -2.772045 | H                    | 2.728788  | -0.129435 | -3.117071 |
| H                | -1.527013 | -0.190453 | -1.979711 | H                    | -1.463465 | 0.888284  | -1.763553 |
| O                | 4.070070  | -0.679106 | 1.661932  | O                    | 4.230357  | -0.940562 | 1.284502  |
| H                | 4.423197  | -1.577294 | 1.703209  | H                    | 4.279068  | -1.888006 | 1.098380  |
| H                | 2.590269  | -0.380091 | 0.740340  | H                    | 3.450396  | -0.622664 | 0.765249  |
| O                | 2.576874  | -0.160656 | 3.892885  | O                    | 2.908713  | -0.451893 | 3.663040  |
| H                | 3.692314  | -0.510983 | 2.556492  | H                    | 3.535652  | -0.618084 | 2.923376  |
| H                | 2.673648  | 0.651691  | 4.405822  | H                    | 3.317677  | 0.247372  | 4.187831  |
| O                | 1.810831  | -0.230939 | -4.459239 | O                    | 1.567250  | -1.422594 | -4.243684 |
| H                | 1.148336  | -0.206883 | -3.729493 | H                    | 0.862545  | -1.393605 | -3.573829 |
| H                | 1.579574  | 0.511446  | -5.031351 | H                    | 1.109517  | -1.566846 | -5.081898 |
| 24               |           |           |           | 24                   |           |           |           |
| 3WT S1 imino     |           |           |           | 3WT TS S1 - S1 3H    |           |           |           |
| N                | 0.724388  | -0.171304 | -1.828177 | N                    | 0.665823  | 0.054228  | -1.885180 |
| C                | 1.868185  | -0.198438 | -1.084673 | C                    | 1.771413  | -0.017360 | -1.120659 |
| N                | 1.944930  | -0.218456 | 0.232484  | N                    | 1.892498  | -0.127584 | 0.264924  |
| C                | 0.661074  | -0.163817 | 0.823801  | C                    | 0.656868  | -0.107178 | 0.864994  |
| C                | -0.564939 | -0.178661 | 0.162402  | C                    | -0.574536 | -0.067252 | 0.187381  |
| C                | -0.577779 | -0.253154 | -1.282876 | C                    | -0.572835 | -0.016878 | -1.292291 |
| N                | -1.601945 | -0.129825 | 1.061224  | N                    | -1.584942 | -0.109629 | 1.084012  |
| C                | -0.986986 | -0.084470 | 2.265356  | C                    | -0.929755 | -0.160240 | 2.325371  |
| N                | 0.374806  | -0.107833 | 2.172181  | N                    | 0.402586  | -0.173370 | 2.239245  |
| N                | 3.030983  | -0.182771 | -1.866702 | N                    | 2.967459  | 0.013141  | -1.763776 |
| H                | -1.503676 | -0.035772 | 3.221206  | H                    | -1.471346 | -0.194457 | 3.268903  |
| H                | 1.064142  | -0.053574 | 2.941273  | H                    | 1.350417  | -0.197775 | 3.067131  |
| H                | 3.824830  | -0.231751 | -1.207445 | H                    | 3.833327  | 0.045903  | -1.236417 |
| H                | 2.597158  | -0.094968 | -3.858838 | H                    | 2.966968  | 0.120140  | -2.771942 |
| H                | -1.422413 | -0.060940 | -1.944016 | H                    | -1.464961 | 0.115103  | -1.906069 |
| O                | 4.113359  | -0.744805 | 1.913910  | O                    | 3.846068  | -0.573692 | 1.731020  |
| H                | 4.281539  | -1.696095 | 1.885816  | H                    | 4.155553  | -1.490685 | 1.703933  |
| H                | 3.387185  | -0.594261 | 1.258000  | H                    | 2.905819  | -0.388545 | 0.907943  |
| O                | 2.500378  | -0.032670 | 4.029073  | O                    | 2.424757  | -0.283236 | 3.668683  |
| H                | 3.210475  | -0.262044 | 3.385966  | H                    | 3.202643  | -0.422592 | 2.782817  |
| H                | 2.802000  | 0.775938  | 4.461580  | H                    | 2.627612  | 0.531122  | 4.150054  |
| O                | 1.829134  | -0.165878 | -4.460193 | O                    | 1.935658  | 0.174418  | -4.386758 |
| H                | 0.862874  | -0.145126 | -2.849209 | H                    | 1.210291  | 0.181512  | -3.720303 |
| H                | 1.929048  | 0.555446  | -5.094808 | H                    | 1.727467  | 0.889409  | -5.001153 |
| 24               |           |           |           | 24                   |           |           |           |
| 3WT TS S1 - C2 X |           |           |           | 3WT TS S1 - S1 imino |           |           |           |
| N                | 0.447442  | -0.054648 | -2.158660 | N                    | 0.687063  | -0.148834 | -1.881602 |
| C                | 1.619913  | -0.158946 | -1.425109 | C                    | 1.824340  | -0.203189 | -1.120511 |
| N                | 1.777669  | -0.942327 | -0.206008 | N                    | 1.992544  | -0.189719 | 0.216711  |
| C                | 0.832828  | -0.321867 | 0.577224  | C                    | 0.742555  | -0.124848 | 0.816368  |
| C                | -0.441334 | 0.029004  | 0.080179  | C                    | -0.512965 | -0.033222 | 0.190766  |
| C                | -0.642099 | -0.071973 | -1.402112 | C                    | -0.566144 | 0.002508  | -1.264997 |
| N                | -1.303966 | 0.357187  | 1.077472  | N                    | -1.517933 | 0.036412  | 1.119557  |
| C                | -0.568385 | 0.226557  | 2.211315  | C                    | -0.879584 | -0.007941 | 2.313870  |
| N                | 0.708542  | -0.196436 | 1.956407  | N                    | 0.475737  | -0.097733 | 2.176361  |
| N                | 2.604824  | 0.747701  | -1.662525 | N                    | 2.959985  | -0.294348 | -1.890929 |
| H                | -0.931503 | 0.433965  | 3.215337  | H                    | -1.370811 | 0.022201  | 3.283772  |
| H                | 1.435512  | -0.379383 | 2.641219  | H                    | 1.163580  | -0.146659 | 2.920271  |
| H                | 3.545209  | 0.539515  | -1.350303 | H                    | 3.826591  | -0.344590 | -1.349508 |
| H                | 2.460441  | 1.489829  | -2.339150 | H                    | 2.689309  | -0.282818 | -3.076422 |
| H                | -1.631693 | -0.053052 | -1.866910 | H                    | -1.466202 | -0.115303 | -1.869334 |
| O                | 3.983298  | -1.928431 | 1.132950  | O                    | 4.228942  | -0.800316 | 1.769288  |
| H                | 4.079282  | -2.881393 | 1.007331  | H                    | 4.376566  | -1.751851 | 1.684800  |
| H                | 3.218190  | -1.670202 | 0.554870  | H                    | 3.468543  | -0.608171 | 1.164309  |
| O                | 2.947362  | -0.940407 | 3.468193  | O                    | 2.655315  | -0.269609 | 3.983956  |
| H                | 3.437254  | -1.341851 | 2.711416  | H                    | 3.356948  | -0.430431 | 3.312857  |
| H                | 3.589477  | -0.369002 | 3.907056  | H                    | 2.985223  | 0.458217  | 4.525391  |
| O                | 1.203117  | 2.152369  | -3.795786 | O                    | 1.830839  | -0.309173 | -4.047886 |
| H                | 0.723009  | 1.330595  | -3.566619 | H                    | 1.052395  | -0.196508 | -3.163580 |
| H                | 1.279703  | 2.138631  | -4.758415 | H                    | 1.820995  | 0.496751  | -4.585562 |
| 24               |           |           |           | 27                   |           |           |           |
| 3WT TS S1 - C6 X |           |           |           | 4WT S0               |           |           |           |
| N                | 0.539880  | -0.106735 | -1.875795 | N                    | 0.519511  | 0.076599  | -2.055218 |
| C                | 1.786998  | 0.062673  | -1.334575 | C                    | 1.704182  | 0.070681  | -1.363872 |
| N                | 1.940297  | 0.008289  | -0.008580 | N                    | 1.849279  | -0.035895 | -0.022011 |
| C                | 0.732887  | -0.076564 | 0.691438  | C                    | 0.677910  | -0.110663 | 0.637150  |
| C                | -0.571987 | 0.015724  | 0.185977  | C                    | -0.607187 | -0.108079 | 0.035483  |
| C                | -0.683882 | 0.309001  | -1.249599 | C                    | -0.628560 | -0.018631 | -1.365315 |
| N                | -1.500340 | -0.009403 | 1.200075  | N                    | -1.605429 | -0.210252 | 0.994936  |
| C                | -0.769176 | -0.128802 | 2.318912  | C                    | -0.921409 | -0.268060 | 2.139022  |
| N                | 0.588531  | -0.164876 | 2.051833  | N                    | 0.451969  | -0.217204 | 1.986905  |
| N                | 2.868847  | 0.206355  | -2.169456 | N                    | 2.841871  | 0.217470  | -2.113115 |
| H                | -1.163569 | -0.219320 | 3.327421  | H                    | -1.375560 | -0.352307 | 3.124791  |

|          |           |           |           |              |           |           |           |
|----------|-----------|-----------|-----------|--------------|-----------|-----------|-----------|
| H        | 1.153193  | -0.191744 | 2.751555  | N            | 1.891257  | -0.284583 | 0.054944  |
| H        | 3.731103  | 0.053718  | -1.656830 | C            | 0.627807  | -0.221245 | 0.707683  |
| H        | 2.762768  | 0.097603  | -3.120956 | C            | -0.605025 | 0.081723  | 0.139090  |
| H        | -1.560843 | -0.025252 | -1.938289 | C            | -0.567478 | 0.438321  | -1.302398 |
| O        | 4.430522  | -0.793992 | 0.617897  | N            | -1.556123 | 0.293340  | 1.112695  |
| H        | 3.485416  | -0.515707 | 0.486623  | C            | -0.889524 | 0.083104  | 2.262077  |
| H        | 4.420835  | -1.748162 | 0.461746  | N            | 0.437057  | -0.226973 | 2.062784  |
| O        | 2.250476  | -0.087838 | 4.123361  | N            | 2.863351  | -0.066908 | -2.082959 |
| H        | 3.205499  | -0.128816 | 3.878696  | H            | -1.334448 | 0.105055  | 3.253774  |
| H        | 2.177197  | 0.715026  | 4.655082  | H            | 1.159701  | -0.323814 | 2.796630  |
| O        | 4.832152  | -0.105545 | 3.251025  | H            | 3.791951  | -0.175383 | -1.682672 |
| H        | 5.565661  | -0.600413 | 3.635154  | H            | 2.694744  | -0.205772 | -3.079557 |
| H        | 4.803647  | -0.369830 | 2.302521  | H            | -0.544914 | 1.510427  | -1.572166 |
| O        | 1.485653  | -0.161192 | -4.717319 | O            | 4.497424  | -0.970007 | 0.512966  |
| H        | 0.888221  | -0.026367 | -3.949368 | H            | 3.523038  | -0.766254 | 0.492212  |
| H        | 1.223449  | 0.509874  | -5.359932 | H            | 4.538824  | -1.935520 | 0.471288  |
| 27       |           |           |           | O            | 2.374298  | -0.236545 | 4.131498  |
| 4WT S1   |           |           |           | H            | 3.305148  | -0.188881 | 3.814107  |
| N        | 0.553186  | -0.012550 | -1.997896 | H            | 2.267672  | 0.562106  | 4.664426  |
| C        | 1.696755  | -0.149641 | -1.272874 | O            | 4.915313  | -0.046523 | 3.092725  |
| N        | 1.898478  | -0.301474 | 0.086653  | H            | 5.683023  | -0.472729 | 3.492693  |
| C        | 0.694285  | -0.162256 | 0.728849  | H            | 4.887883  | -0.378427 | 2.167372  |
| C        | -0.585330 | -0.101896 | 0.124537  | O            | 1.492426  | -0.550242 | -4.590411 |
| C        | -0.668392 | -0.140707 | -1.342854 | H            | 0.709735  | -0.823235 | -4.083807 |
| N        | -1.560178 | -0.037819 | 1.069660  | H            | 1.156054  | 0.041595  | -5.276202 |
| C        | -0.880970 | -0.064103 | 2.254839  | 27           |           |           |           |
| N        | 0.464075  | -0.159260 | 2.096142  | 4WT S1 3H    |           |           |           |
| N        | 2.848507  | -0.137038 | -1.993526 | N            | 0.540109  | 0.095901  | -2.026166 |
| H        | -1.354374 | -0.021170 | 3.233314  | C            | 1.669082  | -0.050197 | -1.336365 |
| H        | 1.181506  | -0.134840 | 2.845696  | N            | 1.763554  | -0.114881 | 0.071108  |
| H        | 3.730982  | -0.266776 | -1.497244 | C            | 0.551990  | -0.119975 | 0.722585  |
| H        | 2.791971  | -0.000952 | -3.013221 | C            | -0.655651 | -0.004522 | 0.068320  |
| H        | -1.581881 | 0.072813  | -1.901796 | C            | -0.682095 | 0.125857  | -1.388205 |
| O        | 4.471027  | -1.032564 | 0.483631  | N            | -1.657857 | -0.178547 | 1.006429  |
| H        | 3.488802  | -0.834643 | 0.486157  | C            | -0.948362 | -0.267508 | 2.242819  |
| H        | 4.523732  | -1.998058 | 0.458802  | N            | 0.361887  | -0.293988 | 2.127716  |
| O        | 2.407223  | -0.009862 | 4.110197  | N            | 2.866609  | -0.135381 | -1.970504 |
| H        | 3.331263  | -0.035207 | 3.767390  | H            | -1.484511 | -0.357225 | 3.186407  |
| H        | 2.371576  | 0.801857  | 4.632243  | H            | 1.673956  | -0.109528 | 3.416291  |
| O        | 4.922780  | -0.012585 | 3.019176  | H            | 3.710851  | -0.277164 | -1.424892 |
| H        | 5.686318  | -0.430411 | 3.435427  | H            | 2.870509  | -0.110863 | -2.991142 |
| H        | 4.887063  | -0.383910 | 2.108734  | H            | -1.584139 | 0.286007  | -1.980110 |
| O        | 1.702745  | 0.144176  | -4.530194 | O            | 4.384381  | -1.060613 | 0.506124  |
| H        | 1.011691  | 0.156353  | -3.824292 | H            | 2.628410  | -0.512215 | 0.469768  |
| H        | 1.507901  | 0.902932  | -5.094744 | H            | 4.537390  | -2.014309 | 0.498705  |
| 27       |           |           |           | O            | 2.405404  | 0.074031  | 4.053830  |
| 4WT C2 X |           |           |           | H            | 4.023562  | -0.068693 | 3.422988  |
| N        | 0.556312  | -0.421177 | -1.989349 | H            | 2.205470  | 0.953545  | 4.399710  |
| C        | 1.763692  | 0.018654  | -1.264999 | O            | 4.906177  | -0.138214 | 2.986123  |
| N        | 1.893731  | -0.500402 | 0.089158  | H            | 5.487531  | -0.536308 | 3.645059  |
| C        | 0.830931  | -0.041275 | 0.751257  | H            | 4.696274  | -0.761852 | 1.396562  |
| C        | -0.434618 | 0.201199  | 0.103972  | O            | 1.686624  | -0.039907 | -4.590459 |
| C        | -0.524957 | -0.146573 | -1.319301 | H            | 1.031456  | 0.069680  | -3.861729 |
| N        | -1.425873 | 0.364335  | 1.015792  | H            | 1.522663  | 0.700125  | -5.188271 |
| C        | -0.793348 | 0.250164  | 2.212696  | 27           |           |           |           |
| N        | 0.534910  | -0.031572 | 2.107579  | 4WT S1 imino |           |           |           |
| N        | 1.926936  | 1.424972  | -1.358007 | N            | 0.661777  | -0.121204 | -1.932521 |
| H        | -1.285421 | 0.371505  | 3.178545  | C            | 1.839651  | -0.215254 | -1.251746 |
| H        | 1.212135  | -0.130904 | 2.895317  | N            | 1.980097  | -0.291899 | 0.058945  |
| H        | 2.804855  | 1.703557  | -0.916372 | C            | 0.732139  | -0.217625 | 0.719151  |
| H        | 1.934108  | 1.716234  | -2.339464 | C            | -0.525307 | -0.184656 | 0.119493  |
| H        | -1.508952 | -0.324789 | -1.772897 | C            | -0.613043 | -0.204980 | -1.324957 |
| O        | 4.578933  | -1.061381 | 0.595473  | N            | -1.515958 | -0.151738 | 1.069851  |
| H        | 3.610981  | -0.997838 | 0.406528  | C            | -0.840571 | -0.164184 | 2.241911  |
| H        | 4.880917  | -1.850661 | 0.129344  | N            | 0.514576  | -0.212439 | 2.080717  |
| O        | 2.335928  | -0.270030 | 4.208778  | N            | 2.963099  | -0.204220 | -2.091272 |
| H        | 3.270614  | -0.287040 | 3.887069  | H            | -1.307795 | -0.140612 | 3.223955  |
| H        | 2.339089  | 0.384901  | 4.917916  | H            | 1.226954  | -0.167144 | 2.831652  |
| O        | 4.840681  | -0.200182 | 3.158070  | H            | 3.789646  | -0.341486 | -1.485270 |
| H        | 5.625864  | -0.558507 | 3.588737  | H            | 2.433768  | -0.020909 | -4.040190 |
| H        | 4.853833  | -0.570640 | 2.244160  | H            | -1.484479 | 0.039966  | -1.931982 |
| O        | 1.738526  | 0.125772  | -4.556111 | O            | 4.495333  | -1.170442 | 0.746773  |
| H        | 1.246047  | -0.281754 | -3.817641 | H            | 3.554430  | -0.879233 | 0.607704  |
| H        | 1.484926  | -0.398317 | -5.325117 | H            | 4.445716  | -2.135553 | 0.779693  |
| 27       |           |           |           | O            | 2.393514  | 0.013986  | 4.165194  |
| 4WT C6 X |           |           |           | H            | 3.337139  | 0.000978  | 3.880431  |
| N        | 0.525200  | -0.392091 | -1.834177 | H            | 2.303173  | 0.845396  | 4.648106  |
| C        | 1.809538  | -0.177049 | -1.248773 | O            | 4.953701  | 0.015693  | 3.191302  |

|                      |           |           |           |   |           |           |           |
|----------------------|-----------|-----------|-----------|---|-----------|-----------|-----------|
| H                    | 5.710776  | -0.374826 | 3.644013  | H | 2.689309  | -0.282818 | -3.076422 |
| H                    | 4.910393  | -0.434560 | 2.316711  | H | -1.466202 | -0.115303 | -1.869334 |
| O                    | 1.642018  | -0.050800 | -4.614754 | O | 4.537298  | -1.011331 | 0.776392  |
| H                    | 0.749457  | -0.058312 | -2.957566 | H | 3.578066  | -0.745980 | 0.720844  |
| H                    | 1.737611  | 0.689600  | -5.227635 | H | 4.516544  | -1.978018 | 0.805811  |
| 27                   |           |           |           | O | 2.382202  | -0.100488 | 4.274529  |
| 4WT TS S1 - C2 X     |           |           |           | H | 3.322747  | -0.064345 | 3.985480  |
| N                    | 0.447442  | -0.054648 | -2.158660 | H | 2.288059  | 0.660579  | 4.861411  |
| C                    | 1.619913  | -0.158946 | -1.425109 | O | 4.955508  | 0.049003  | 3.305793  |
| N                    | 1.777669  | -0.942327 | -0.206008 | H | 5.719587  | -0.347574 | 3.741361  |
| C                    | 0.832828  | -0.321867 | 0.577224  | H | 4.943475  | -0.335014 | 2.400745  |
| C                    | -0.441334 | 0.029004  | 0.080179  | O | 1.830839  | -0.309173 | -4.047886 |
| C                    | -0.642099 | -0.071973 | -1.402112 | H | 1.052395  | -0.196508 | -3.163580 |
| N                    | -1.303966 | 0.357187  | 1.077472  | H | 1.820995  | 0.496751  | -4.585562 |
| C                    | -0.568385 | 0.226557  | 2.211315  |   |           |           |           |
| N                    | 0.708542  | -0.196436 | 1.956407  |   |           |           |           |
| N                    | 2.604824  | 0.747701  | -1.662525 |   |           |           |           |
| H                    | -0.931503 | 0.433965  | 3.215337  |   |           |           |           |
| H                    | 1.435512  | -0.379383 | 2.641219  |   |           |           |           |
| H                    | 3.545209  | 0.539515  | -1.350303 |   |           |           |           |
| H                    | 2.460441  | 1.489829  | -2.339150 |   |           |           |           |
| H                    | -1.631693 | -0.053052 | -1.866910 |   |           |           |           |
| O                    | 4.486524  | -1.054848 | 0.017820  |   |           |           |           |
| H                    | 3.493903  | -1.171151 | 0.040268  |   |           |           |           |
| H                    | 4.826125  | -1.891417 | -0.327265 |   |           |           |           |
| O                    | 2.728636  | -0.658433 | 3.859484  |   |           |           |           |
| H                    | 3.620316  | -0.516273 | 3.463376  |   |           |           |           |
| H                    | 2.738129  | -0.138009 | 4.672356  |   |           |           |           |
| O                    | 5.106516  | -0.222125 | 2.568419  |   |           |           |           |
| H                    | 5.929024  | -0.629527 | 2.866019  |   |           |           |           |
| H                    | 4.985317  | -0.539021 | 1.644017  |   |           |           |           |
| O                    | 1.181827  | 2.159226  | -3.804220 |   |           |           |           |
| H                    | 0.711730  | 1.334800  | -3.564036 |   |           |           |           |
| H                    | 1.271149  | 2.126056  | -4.765251 |   |           |           |           |
| 27                   |           |           |           |   |           |           |           |
| 4WT TS S1 - C6 X     |           |           |           |   |           |           |           |
| N                    | 0.539880  | -0.106735 | -1.875795 |   |           |           |           |
| C                    | 1.786998  | 0.062673  | -1.334575 |   |           |           |           |
| N                    | 1.940297  | 0.008289  | -0.008580 |   |           |           |           |
| C                    | 0.732887  | -0.076564 | 0.691438  |   |           |           |           |
| C                    | -0.571987 | 0.015724  | 0.185977  |   |           |           |           |
| C                    | -0.683882 | 0.309001  | -1.249599 |   |           |           |           |
| N                    | -1.500340 | -0.009403 | 1.200075  |   |           |           |           |
| C                    | -0.769176 | -0.128802 | 2.318912  |   |           |           |           |
| N                    | 0.588531  | -0.164876 | 2.051833  |   |           |           |           |
| N                    | 2.868847  | 0.206355  | -2.169456 |   |           |           |           |
| H                    | -1.163569 | -0.219320 | 3.327421  |   |           |           |           |
| H                    | 1.341022  | -0.244158 | 2.727851  |   |           |           |           |
| H                    | 3.754412  | -0.060572 | -1.748208 |   |           |           |           |
| H                    | 2.728788  | -0.129435 | -3.117071 |   |           |           |           |
| H                    | -1.463465 | 0.888284  | -1.763553 |   |           |           |           |
| O                    | 4.466299  | -1.014294 | 0.391482  |   |           |           |           |
| H                    | 3.530571  | -0.680884 | 0.372724  |   |           |           |           |
| H                    | 4.376123  | -1.976800 | 0.361434  |   |           |           |           |
| O                    | 2.640189  | -0.266663 | 4.005463  |   |           |           |           |
| H                    | 3.564712  | -0.208685 | 3.671099  |   |           |           |           |
| H                    | 2.576731  | 0.453067  | 4.646071  |   |           |           |           |
| O                    | 5.146208  | -0.059500 | 2.891269  |   |           |           |           |
| H                    | 5.941427  | -0.484330 | 3.234569  |   |           |           |           |
| H                    | 5.034694  | -0.414934 | 1.980918  |   |           |           |           |
| O                    | 1.565932  | -1.430051 | -4.246354 |   |           |           |           |
| H                    | 0.864749  | -1.386712 | -3.573241 |   |           |           |           |
| H                    | 1.102027  | -1.568556 | -5.082204 |   |           |           |           |
| 27                   |           |           |           |   |           |           |           |
| 4WT TS S1 - S1 imino |           |           |           |   |           |           |           |
| N                    | 0.687063  | -0.148834 | -1.881602 |   |           |           |           |
| C                    | 1.824340  | -0.203189 | -1.120511 |   |           |           |           |
| N                    | 1.992544  | -0.189719 | 0.216711  |   |           |           |           |
| C                    | 0.742555  | -0.124848 | 0.816368  |   |           |           |           |
| C                    | -0.512965 | -0.033222 | 0.190766  |   |           |           |           |
| C                    | -0.566144 | 0.002508  | -1.264997 |   |           |           |           |
| N                    | -1.517933 | 0.036412  | 1.119557  |   |           |           |           |
| C                    | -0.879584 | -0.007941 | 2.313870  |   |           |           |           |
| N                    | 0.475737  | -0.097733 | 2.176361  |   |           |           |           |
| N                    | 2.959985  | -0.294348 | -1.890929 |   |           |           |           |
| H                    | -1.370811 | 0.022201  | 3.283772  |   |           |           |           |
| H                    | 1.163580  | -0.146659 | 2.920271  |   |           |           |           |
| H                    | 3.826591  | -0.344590 | -1.349508 |   |           |           |           |
